# Supplementary material for: Cost and Affordability of Habitual and Recommended Diets in Welfare-Dependent Households in Australia
Source: MDPI journal article supplement (doi:10.3390/nu16050659), 2024-02-26
Supplement: s1 [file s1]

Table S1: Composition of the original Healthy Diets ASAP habitual diet pricing tool for mean Australian population and the Low SEG Healthy Diets ASAP habitual diet pricing tool, and recommended diet pricing tool for a two adult, older female, three children household (Household A)

| Food item                                            | Habitual Diet (g/fortnight) |                            | Recommended Diet (g/fortnight)<br>Original & Low SEG Healthy Diets ASAP |
|------------------------------------------------------|-----------------------------|----------------------------|-------------------------------------------------------------------------|
|                                                      | Original Healthy Diets ASAP | Low SEG Healthy Diets ASAP |                                                                         |
| <b>Energy (kJ/day)</b>                               | 46943 kJ                    | 45651 kJ                   | 46404 kJ                                                                |
| <b>Water</b>                                         |                             |                            |                                                                         |
| Water, bottled (mL)                                  | 5948                        | 3943 (34% < Original)      | 5948                                                                    |
| <b>Fruit</b>                                         |                             |                            |                                                                         |
| Apples (g)                                           | 5072                        | 5439                       | 7910                                                                    |
| Bananas (g)                                          | 1741                        | 1501                       | 7910                                                                    |
| Oranges (g)                                          | 2496                        | 1552                       | 7910                                                                    |
| Fruit salad, canned in juice (g)                     | 3819                        | 2899                       | 0                                                                       |
| Total Fruit (g)                                      | 17700                       | 15593 (12% < Original)     | 23730                                                                   |
| <b>Vegetables and Legumes</b>                        |                             |                            |                                                                         |
| Potato, loose (g)                                    | 2181                        | 2690                       | 2970                                                                    |
| Broccoli, loose (g)                                  | 620                         | 594                        | 2170                                                                    |
| White cabbage, loose (g)                             | 331                         | 276                        | 2170                                                                    |
| Iceberg lettuce, whole (g)                           | 1071                        | 950                        | 2170                                                                    |
| Carrot, loose (g)                                    | 1130                        | 1019                       | 3255                                                                    |
| Pumpkin (g)                                          | 407                         | 532                        | 3255                                                                    |
| Onion, loose (g)                                     | 124                         | 155                        | 2373                                                                    |
| Tomatoes, loose (g)                                  | 712                         | 943                        | 2373                                                                    |
| Sweetcorn, canned (g)                                | 427                         | 390                        | 1485                                                                    |
| Four bean mix, canned (g)                            | 111                         | 73                         | 1380                                                                    |
| Diced tomatoes, canned (g)                           | 314                         | 272                        | 2373                                                                    |
| Baked Beans, canned (g)                              | 525                         | 352                        | 1380                                                                    |
| Frozen mixed vegetables (g)                          | 1744                        | 1125                       | 2373                                                                    |
| Frozen peas (g)                                      | 419                         | 511                        | 2373                                                                    |
| Total Vegetables and Legumes (g)                     | 11143                       | 10622 (5% < Original)      | 32366                                                                   |
| <b>Grain (Cereal) Foods – Wholegrain and Refined</b> |                             |                            |                                                                         |
| Wholemeal bread, pre-packaged (g)                    | 1680                        | 1620                       | 5472                                                                    |
| White bread, pre-packaged (g)                        | 4215                        | 4322                       | 1133                                                                    |
| Rolled oats (g)                                      | 1629                        | 1384                       | 8688                                                                    |
| Breakfast cereal, corn flakes (g)                    | 1019                        | 775                        | 850                                                                     |
| Breakfast cereal, wheat biscuits (g)                 | 569                         | 338                        | 2896                                                                    |

| Food item                                                                   | Habitual Diet (g/fortnight) |                            | Recommended Diet (g/fortnight)<br>Original & Low SEG Healthy Diets ASAP |
|-----------------------------------------------------------------------------|-----------------------------|----------------------------|-------------------------------------------------------------------------|
|                                                                             | Original Healthy Diets ASAP | Low SEG Healthy Diets ASAP |                                                                         |
| White pasta (g)                                                             | 1683                        | 1460                       | 2571                                                                    |
| White rice (g)                                                              | 2207                        | 2368                       | 2571                                                                    |
| Dry wheat crackers, water crackers (g)                                      | 369                         | 165                        | 991                                                                     |
| Total Grain (Cereal) Foods (g)                                              | 13528                       | 12634 (7% < Original)      | 25438                                                                   |
| <b>Lean Meats and Poultry, Fish, Eggs, Nuts and Seeds</b>                   |                             |                            |                                                                         |
| Tuna, canned in oil (g)                                                     | 1480                        | 1119                       | 2675                                                                    |
| Beef mince, lean (g)                                                        | 395                         | 256                        | 1514                                                                    |
| Lamb loin chops (g)                                                         | 454                         | 543                        | 1516                                                                    |
| Beef rump steak (g)                                                         | 1336                        | 1315                       | 1519                                                                    |
| Eggs (g)                                                                    | 1306                        | 1201                       | 3208                                                                    |
| Chicken, cooked whole (g)                                                   | 2332                        | 1703                       | 2137                                                                    |
| Peanuts, roasted, unsalted (g)                                              | 0                           | 0                          | 960                                                                     |
| Total Lean Meats and Poultry, Fish, Eggs, Nuts and Seeds (g)                | 8330                        | 6876 (17% < Original)      | 13795                                                                   |
| <b>Milk, Yoghurt, Cheese and Alternatives</b>                               |                             |                            |                                                                         |
| Cheddar cheese, full fat (g)                                                | 976                         | 954                        | 1104                                                                    |
| Cheddar cheese, reduced fat (g)                                             | 71                          | 72                         | 814                                                                     |
| Milk, full fat (mL)                                                         | 8967                        | 10373                      | 10157                                                                   |
| Milk, reduced fat (mL)                                                      | 4348                        | 2915                       | 18543                                                                   |
| Flavoured milk (mL)                                                         | 3169                        | 2744                       | 0                                                                       |
| Yoghurt, full fat, plain (g)                                                | 315                         | 168                        | 4064                                                                    |
| Yoghurt, flavoured reduced fat (g)                                          | 1568                        | 1197                       | 8050                                                                    |
| Total Milk, Yoghurt, Cheese and Alternatives (g)                            | 19414                       | 18422 (5% < Original)      | 42732                                                                   |
| <b>Unsaturated Oils and Spreads (or foods from which these are derived)</b> |                             |                            |                                                                         |
| Sunflower oil (mL)                                                          | 9                           | 22                         | 380                                                                     |
| Olive oil (mL)                                                              | 9                           | 22                         | 380                                                                     |
| Canola margarine (g)                                                        | 266                         | 314                        | 538                                                                     |
| Total Unsaturated Oils and Spreads (g)                                      | 284                         | 358 (26% > Original)       | 1298                                                                    |
| <b>Discretionary Choices – other</b>                                        |                             |                            |                                                                         |
| Chicken soup, canned (g)                                                    | 2368                        | 3386                       | 0                                                                       |
| Muffin, commercial (g)                                                      | 2125                        | 1463                       | 0                                                                       |

| Food item                                    | Habitual Diet (g/fortnight) |                            | Recommended Diet (g/fortnight)<br>Original & Low SEG Healthy Diets ASAP |
|----------------------------------------------|-----------------------------|----------------------------|-------------------------------------------------------------------------|
|                                              | Original Healthy Diets ASAP | Low SEG Healthy Diets ASAP |                                                                         |
| Instant noodles, wheat based (g)             | 621                         | 378                        | 0                                                                       |
| White sugar (g)                              | 935                         | 1126                       | 0                                                                       |
| Cream-filled sweet biscuit, pre-packaged (g) | 807                         | 992                        | 0                                                                       |
| Muesli bar, pre-packaged (g)                 | 495                         | 505                        | 0                                                                       |
| Savoury flavoured crackers (g)               | 262                         | 278                        | 0                                                                       |
| Nuts, mixed, salted (g)                      | 336                         | 325                        | 0                                                                       |
| Confectionary (g)                            | 625                         | 605                        | 0                                                                       |
| Chocolate (g)                                | 528                         | 496                        | 0                                                                       |
| Potato crisps, pre-packaged (g)              | 809                         | 865                        | 0                                                                       |
| Salad dressing (g)                           | 497                         | 319                        | 0                                                                       |
| Tomato sauce (g)                             | 731                         | 685                        | 0                                                                       |
| Beef sausages (g)                            | 1459                        | 1505                       | 0                                                                       |
| Butter (g)                                   | 455                         | 266                        | 0                                                                       |
| Ham (g)                                      | 282                         | 223                        | 0                                                                       |
| Frozen lasagne, pre-packaged (g)             | 5369                        | 4579                       | 0                                                                       |
| Fish fillet crumbed, pre-packaged (g)        | 548                         | 650                        | 0                                                                       |
| Ice cream (g)                                | 2666                        | 2066                       | 0                                                                       |
| Total Discretionary – other (g)              | 26489                       | 24912 (6% < Original)      | 0                                                                       |
| <b>Alcoholic Drinks</b>                      |                             |                            |                                                                         |
| Beer, full strength (mL)                     | 4905                        | 5469                       | 0                                                                       |
| White wine, sparkling (mL)                   | 1377                        | 970                        | 0                                                                       |
| Whisky (mL)                                  | 356                         | 572                        | 0                                                                       |
| Red wine (mL)                                | 1385                        | 788                        | 0                                                                       |
| Total Alcoholic Drinks (mL)                  | 8023                        | 7799 (3% < Original)       | 0                                                                       |
| <b>Takeaway foods</b>                        |                             |                            |                                                                         |
| Pizza, commercial (g)                        | 1448                        | 2242                       | 0                                                                       |
| Meat pie, commercial (g)                     | 1982                        | 1952                       | 0                                                                       |
| Hamburger, commercial (g)                    | 2793                        | 3272                       | 0                                                                       |
| Potato chips, commercial (g)                 | 807                         | 1049                       | 0                                                                       |
| Total Takeaway foods (g)                     | 7030                        | 8515 (21% > Original)      | 0                                                                       |
| <b>Sugar sweetened drinks</b>                |                             |                            |                                                                         |
| Sugar-sweetened soft drink (mL)              | 13516                       | 18363 (36% > Original)     | 0                                                                       |
| <b>Artificially sweetened drinks</b>         |                             |                            |                                                                         |

| Food item                                               | Habitual Diet (g/fortnight) |                            | Recommended Diet (g/fortnight)<br>Original & Low SEG Healthy Diets ASAP |
|---------------------------------------------------------|-----------------------------|----------------------------|-------------------------------------------------------------------------|
|                                                         | Original Healthy Diets ASAP | Low SEG Healthy Diets ASAP |                                                                         |
| Artificially sweetened soft drink (mL)                  | 2660                        | 1484 (42% < Original)      | 0                                                                       |
| <b>Items allocated to more than one food group</b>      |                             |                            |                                                                         |
| Sandwich, pre-made, white bread, chicken and salad* (g) | 469                         | 606                        | 800                                                                     |
| Canned meat and vegetable casserole** (g)               | 1473                        | 1074                       | 0                                                                       |
| Orange fruit juice*** (mL)                              | 9143                        | 8405                       | 0                                                                       |

\*Divided equally between Grains etc, Lean meats etc, and Vegetables

\*\*Divided equally between Lean meats etc and Vegetables

\*\*\*Divided equally between Fruit and Discretionary choices – other

Table S2: Composition of the original Healthy Diets ASAP habitual diet pricing tool for mean Australian population and the Low SEG Healthy Diets ASAP habitual diet pricing tool, and recommended diet pricing tool, for a two adults, two children household (Household B)

| Food item                                            | Habitual Diet (g/fortnight) |                            | Recommended Diet (g/fortnight)<br>Original & Low SEG Healthy Diets ASAP |
|------------------------------------------------------|-----------------------------|----------------------------|-------------------------------------------------------------------------|
|                                                      | Original Healthy Diets ASAP | Low SEG Healthy Diets ASAP |                                                                         |
| <b>Energy (kJ/day)</b>                               | 33,602 kJ                   | 32,517 kJ                  | 32,996 kJ                                                               |
| <b>Water</b>                                         |                             |                            |                                                                         |
| Water, bottled (mL)                                  | 5296                        | 3485 (34% < Original)      | 5296                                                                    |
| <b>Fruit</b>                                         |                             |                            |                                                                         |
| Apples (g)                                           | 3497                        | 3638                       | 5460                                                                    |
| Bananas (g)                                          | 899                         | 795                        | 5460                                                                    |
| Oranges (g)                                          | 1664                        | 971                        | 5460                                                                    |
| Fruit salad, canned in juice (g)                     | 2046                        | 1544                       | 0                                                                       |
| Total Fruit (g)                                      | 11133                       | 9614 (14% < Original)      | 16380                                                                   |
| <b>Vegetables and Legumes</b>                        |                             |                            |                                                                         |
| Potato, loose (g)                                    | 1460                        | 1844                       | 2320                                                                    |
| Broccoli, loose (g)                                  | 422                         | 389                        | 1470                                                                    |
| White cabbage, loose (g)                             | 235                         | 175                        | 1470                                                                    |
| Iceberg lettuce, whole (g)                           | 795                         | 704                        | 1470                                                                    |
| Carrot, loose (g)                                    | 753                         | 618                        | 2205                                                                    |
| Pumpkin (g)                                          | 240                         | 330                        | 2205                                                                    |
| Onion, loose (g)                                     | 84                          | 106                        | 1638                                                                    |
| Tomatoes, loose (g)                                  | 488                         | 654                        | 1638                                                                    |
| Sweetcorn, canned (g)                                | 206                         | 216                        | 1160                                                                    |
| Four bean mix, canned (g)                            | 74                          | 61                         | 1005                                                                    |
| Diced tomatoes, canned (g)                           | 235                         | 175                        | 1638                                                                    |
| Baked Beans, canned (g)                              | 369                         | 237                        | 1005                                                                    |
| Frozen mixed vegetables (g)                          | 1184                        | 746                        | 1638                                                                    |
| Frozen peas (g)                                      | 273                         | 334                        | 1638                                                                    |
| Total Vegetables and Legumes (g)                     | 7584                        | 7136 (6% < Original)       | 22500                                                                   |
| <b>Grain (Cereal) Foods – Wholegrain and Refined</b> |                             |                            |                                                                         |
| Wholemeal bread, pre-packaged (g)                    | 1054                        | 870                        | 4272                                                                    |
| White bread, pre-packaged (g)                        | 3033                        | 3001                       | 893                                                                     |
| Rolled oats (g)                                      | 870                         | 578                        | 6648                                                                    |
| Breakfast cereal, corn flakes (g)                    | 680                         | 509                        | 670                                                                     |
| Breakfast cereal, wheat biscuits (g)                 | 430                         | 243                        | 2216                                                                    |

| Food item                                                                   | Habitual Diet (g/fortnight) |                            | Recommended Diet (g/fortnight)<br>Original & Low SEG Healthy Diets ASAP |
|-----------------------------------------------------------------------------|-----------------------------|----------------------------|-------------------------------------------------------------------------|
|                                                                             | Original Healthy Diets ASAP | Low SEG Healthy Diets ASAP |                                                                         |
| White pasta (g)                                                             | 1326                        | 988                        | 2042                                                                    |
| White rice (g)                                                              | 1622                        | 1904                       | 2042                                                                    |
| Dry wheat crackers, water crackers (g)                                      | 258                         | 89                         | 781                                                                     |
| Total Grain (Cereal) Foods (g)                                              | 9393                        | 8336 (11% < Original)      | 19564                                                                   |
| <b>Lean Meats and Poultry, Fish, Eggs, Nuts and Seeds</b>                   |                             |                            |                                                                         |
| Tuna, canned in oil (g)                                                     | 1052                        | 760                        | 1841                                                                    |
| Beef mince, lean (g)                                                        | 267                         | 163                        | 1168                                                                    |
| Lamb loin chops (g)                                                         | 257                         | 333                        | 1169                                                                    |
| Beef rump steak (g)                                                         | 1056                        | 1042                       | 1172                                                                    |
| Eggs (g)                                                                    | 872                         | 884                        | 2208                                                                    |
| Chicken, cooked whole (g)                                                   | 1661                        | 1093                       | 1471                                                                    |
| Peanuts, roasted, unsalted (g)                                              | 0                           | 0                          | 780                                                                     |
| Total Lean Meats and Poultry, Fish, Eggs, Nuts and Seeds (g)                | 5931                        | 4822 (19% < Original)      | 9809                                                                    |
| <b>Milk, Yoghurt, Cheese, and Alternatives</b>                              |                             |                            |                                                                         |
| Cheddar cheese, full fat (g)                                                | 624                         | 682                        | 704                                                                     |
| Cheddar cheese, reduced fat (g)                                             | 44                          | 49                         | 516                                                                     |
| Milk, full fat (mL)                                                         | 5961                        | 7301                       | 6438                                                                    |
| Milk, reduced fat (mL)                                                      | 2929                        | 1839                       | 12000                                                                   |
| Flavoured milk (mL)                                                         | 2416                        | 2187                       | 0                                                                       |
| Yoghurt, full fat, plain (g)                                                | 204                         | 101                        | 2576                                                                    |
| Yoghurt, flavoured reduced fat (g)                                          | 676                         | 722                        | 5100                                                                    |
| Total Milk, Yoghurt, Cheese, and Alternatives (g)                           | 12854                       | 12881 (0.2% > Original)    | 27334                                                                   |
| <b>Unsaturated Oils and Spreads (or foods from which these are derived)</b> |                             |                            |                                                                         |
| Sunflower oil (mL)                                                          | 7                           | 15                         | 291                                                                     |
| Olive oil (mL)                                                              | 7                           | 15                         | 291                                                                     |
| Canola margarine (g)                                                        | 170                         | 197                        | 412                                                                     |
| Total Unsaturated Oils and Spreads (g)                                      | 184                         | 227 (23% > Original)       | 994                                                                     |
| <b>Discretionary Choices – other</b>                                        |                             |                            |                                                                         |
| Chicken soup, canned (g)                                                    | 1340                        | 2219                       | 0                                                                       |
| Muffin, commercial (g)                                                      | 1455                        | 922                        | 0                                                                       |

| Food item                                    | Habitual Diet (g/fortnight) |                            | Recommended Diet (g/fortnight)<br>Original & Low SEG Healthy Diets ASAP |
|----------------------------------------------|-----------------------------|----------------------------|-------------------------------------------------------------------------|
|                                              | Original Healthy Diets ASAP | Low SEG Healthy Diets ASAP |                                                                         |
| Instant noodles, wheat based (g)             | 381                         | 227                        | 0                                                                       |
| White sugar (g)                              | 566                         | 714                        | 0                                                                       |
| Cream-filled sweet biscuit, pre-packaged (g) | 496                         | 628                        | 0                                                                       |
| Muesli bar, pre-packaged (g)                 | 373                         | 339                        | 0                                                                       |
| Savoury flavoured biscuits (g)               | 222                         | 207                        | 0                                                                       |
| Nuts, mixed, salted (g)                      | 255                         | 262                        | 0                                                                       |
| Confectionary (g)                            | 418                         | 396                        | 0                                                                       |
| Chocolate (g)                                | 441                         | 359                        | 0                                                                       |
| Potato crisps, pre-packaged (g)              | 518                         | 650                        | 0                                                                       |
| Salad dressing (g)                           | 277                         | 211                        | 0                                                                       |
| Tomato sauce (g)                             | 569                         | 511                        | 0                                                                       |
| Beef sausages (g)                            | 1047                        | 1036                       | 0                                                                       |
| Butter (g)                                   | 280                         | 195                        | 0                                                                       |
| Ham (g)                                      | 189                         | 143                        | 0                                                                       |
| Frozen lasagne, pre-packaged (g)             | 4322                        | 3684                       | 0                                                                       |
| Fish fillet crumbed, pre-packaged (g)        | 302                         | 433                        | 0                                                                       |
| Ice cream (g)                                | 1830                        | 1307                       | 0                                                                       |
| Total Discretionary Choices – other (g)      | 18308                       | 17109 (7% < Original)      | 0                                                                       |
| <b>Alcoholic Drinks</b>                      |                             |                            |                                                                         |
| Beer, full strength (mL)                     | 4661                        | 5060                       | 0                                                                       |
| White wine, sparkling (mL)                   | 863                         | 546                        | 0                                                                       |
| Whisky (mL)                                  | 266                         | 453                        | 0                                                                       |
| Red wine (mL)                                | 1078                        | 519                        | 0                                                                       |
| Total Alcoholic Drinks (mL)                  | 6868                        | 6578 (4% < Original)       | 0                                                                       |
| <b>Takeaway foods</b>                        |                             |                            |                                                                         |
| Pizza, commercial (g)                        | 1182                        | 1800                       | 0                                                                       |
| Meat pie, commercial (g)                     | 1638                        | 1554                       | 0                                                                       |
| Hamburger, commercial (g)                    | 2413                        | 2710                       | 0                                                                       |
| Potato chips, commercial (g)                 | 670                         | 833                        | 0                                                                       |
| Total Takeaway Foods (g)                     | 5903                        | 6897 (17% > Original)      | 0                                                                       |
| <b>Sugar sweetened beverages</b>             |                             |                            |                                                                         |
| Sugar-sweetened soft drink (mL)              | 12012                       | 16288 (36% > Original)     | 0                                                                       |
| <b>Artificially sweetened drinks</b>         |                             |                            |                                                                         |

| Food item                                                | Habitual Diet (g/fortnight) |                            | Recommended Diet (g/fortnight)<br>Original & Low SEG Healthy Diets ASAP |
|----------------------------------------------------------|-----------------------------|----------------------------|-------------------------------------------------------------------------|
|                                                          | Original Healthy Diets ASAP | Low SEG Healthy Diets ASAP |                                                                         |
| Artificially sweetened soft drink (mL)                   | 2390                        | 1406 (41% < Original)      | 0                                                                       |
| <b>Items allocated to more than one food group</b>       |                             |                            |                                                                         |
| Sandwich, pre-made, white bread, chicken, and salad* (g) | 361                         | 462                        | 360                                                                     |
| Canned meat and vegetable casserole** (g)                | 1291                        | 786                        | 0                                                                       |
| Orange fruit juice*** (mL)                               | 6053                        | 5331                       | 0                                                                       |

\*Divided equally between Grains etc, Lean meats etc, and Vegetables

\*\*Divided equally between Lean meats etc and Vegetables

\*\*\*Divided equally between Fruit and Discretionary choices - other

Table S3: Composition of the original Healthy Diets ASAP habitual diet pricing tool for mean Australian population and the Low SEG Healthy Diets ASAP habitual diet pricing tool, and recommended diet pricing tool, for an adult female, two children household (Household C)

| Food item                                            | Habitual Diet (g/fortnight) |                               | Recommended Diet (g/fortnight)<br>Original & Low SEG Healthy Diets ASAP |
|------------------------------------------------------|-----------------------------|-------------------------------|-------------------------------------------------------------------------|
|                                                      | Original Healthy Diets ASAP | Low SEG Healthy Diets ASAP    |                                                                         |
| <b>Energy (kJ/day)</b>                               | 23,890 kJ                   | 23,424 kJ                     | 23,658 kJ                                                               |
| <b>Water</b>                                         |                             |                               |                                                                         |
| Water, bottled (mL)                                  | 3275                        | 2273 (31% less than Original) | 3275                                                                    |
| <b>Fruit</b>                                         |                             |                               |                                                                         |
| Apples (g)                                           | 2774                        | 2808                          | 4060                                                                    |
| Bananas (g)                                          | 606                         | 614                           | 4060                                                                    |
| Oranges (g)                                          | 1304                        | 560                           | 4060                                                                    |
| Fruit salad, canned in juice (g)                     | 1425                        | 1089                          | 0                                                                       |
| Total Fruit (g)                                      | 8476                        | 7298 (14% less than Original) | 12180                                                                   |
| <b>Vegetables and Legumes</b>                        |                             |                               |                                                                         |
| Potato, loose (g)                                    | 944                         | 955                           | 1620                                                                    |
| Broccoli, loose (g)                                  | 277                         | 209                           | 1120                                                                    |
| White cabbage, loose (g)                             | 141                         | 137                           | 1120                                                                    |
| Iceberg lettuce, whole (g)                           | 468                         | 378                           | 1120                                                                    |
| Carrot, loose (g)                                    | 583                         | 485                           | 1680                                                                    |
| Pumpkin (g)                                          | 154                         | 289                           | 1680                                                                    |
| Onion, loose (g)                                     | 37                          | 82                            | 1218                                                                    |
| Tomatoes, loose (g)                                  | 301                         | 397                           | 1218                                                                    |
| Sweetcorn, canned (g)                                | 130                         | 179                           | 810                                                                     |
| Four bean mix, canned (g)                            | 50                          | 42                            | 480                                                                     |
| Diced tomatoes, canned (g)                           | 141                         | 110                           | 1218                                                                    |
| Baked Beans, canned (g)                              | 241                         | 96                            | 480                                                                     |
| Frozen mixed vegetables (g)                          | 760                         | 482                           | 1218                                                                    |
| Frozen peas (g)                                      | 167                         | 128                           | 1218                                                                    |
| Total Vegetables and Legumes (g)                     | 4884                        | 4269 (13% less than Original) | 16200                                                                   |
| <b>Grain (Cereal) Foods – Wholegrain and Refined</b> |                             |                               |                                                                         |
| Wholemeal bread, pre-packaged (g)                    | 683                         | 607                           | 3152                                                                    |
| White bread, pre-packaged (g)                        | 2344                        | 2177                          | 669                                                                     |
| Rolled oats (g)                                      | 615                         | 559                           | 4968                                                                    |
| Breakfast cereal, corn flakes (g)                    | 525                         | 289                           | 502                                                                     |
| Breakfast cereal, wheat biscuits (g)                 | 263                         | 160                           | 1656                                                                    |

| Food item                                                                   | Habitual Diet (g/fortnight) |                               | Recommended Diet (g/fortnight)<br>Original & Low SEG Healthy Diets ASAP |
|-----------------------------------------------------------------------------|-----------------------------|-------------------------------|-------------------------------------------------------------------------|
|                                                                             | Original Healthy Diets ASAP | Low SEG Healthy Diets ASAP    |                                                                         |
| White pasta (g)                                                             | 942                         | 580                           | 1499                                                                    |
| White rice (g)                                                              | 1098                        | 1248                          | 1499                                                                    |
| Dry wheat crackers, water crackers (g)                                      | 225                         | 70                            | 585                                                                     |
| Total Grain (Cereal) Foods (g)                                              | 6753                        | 5837 (14% less than Original) | 14530                                                                   |
| <b>Lean Meats and Poultry, Fish, Eggs, Nuts and Seeds</b>                   |                             |                               |                                                                         |
| Tuna, canned in oil (g)                                                     | 756                         | 553                           | 1374                                                                    |
| Beef mince, lean (g)                                                        | 157                         | 78                            | 865                                                                     |
| Lamb loin chops (g)                                                         | 83                          | 113                           | 866                                                                     |
| Beef rump steak (g)                                                         | 683                         | 692                           | 868                                                                     |
| Eggs (g)                                                                    | 565                         | 524                           | 1648                                                                    |
| Chicken, cooked whole (g)                                                   | 1004                        | 829                           | 1098                                                                    |
| Peanuts, roasted, unsalted (g)                                              | 0                           | 0                             | 360                                                                     |
| Total Lean Meats and Poultry, Fish, Eggs, Nuts and Seeds (g)                | 3738                        | 3089 (17% less than Original) | 7079                                                                    |
| <b>Milk, Yoghurt, Cheese and Alternatives</b>                               |                             |                               |                                                                         |
| Cheddar cheese, full fat (g)                                                | 467                         | 509                           | 544                                                                     |
| Cheddar cheese, reduced fat (g)                                             | 29                          | 39                            | 396                                                                     |
| Milk, full fat (mL)                                                         | 4702                        | 5328                          | 4938                                                                    |
| Milk, reduced fat (mL)                                                      | 2102                        | 1301                          | 9000                                                                    |
| Flavoured milk (mL)                                                         | 1529                        | 1375                          | 0                                                                       |
| Yoghurt, full fat, plain (g)                                                | 127                         | 69                            | 1976                                                                    |
| Yoghurt, flavoured reduced fat (g)                                          | 467                         | 597                           | 3900                                                                    |
| Total Milk, Yoghurt, Cheese and Alternatives (g)                            | 9423                        | 9218 (2% less than Original)  | 20754                                                                   |
| <b>Unsaturated Oils and Spreads (or foods from which these are derived)</b> |                             |                               |                                                                         |
| Sunflower oil (mL)                                                          | 4                           | 7                             | 160                                                                     |
| Olive oil (mL)                                                              | 4                           | 7                             | 160                                                                     |
| Canola margarine (g)                                                        | 127                         | 149                           | 226                                                                     |
| Total Unsaturated Oils and Spreads (g)                                      | 135                         | 163 (21% more than Original)  | 546                                                                     |
| <b>Discretionary Choices – other</b>                                        |                             |                               |                                                                         |
| Chicken soup, canned (g)                                                    | 715                         | 876                           | 0                                                                       |
| Muffin, commercial (g)                                                      | 1104                        | 666                           | 0                                                                       |

| Food item                                    | Habitual Diet (g/fortnight) |                                | Recommended Diet (g/fortnight)<br>Original & Low SEG Healthy Diets ASAP |
|----------------------------------------------|-----------------------------|--------------------------------|-------------------------------------------------------------------------|
|                                              | Original Healthy Diets ASAP | Low SEG Healthy Diets ASAP     |                                                                         |
| Instant noodles, wheat based (g)             | 301                         | 196                            | 0                                                                       |
| White sugar (g)                              | 373                         | 430                            | 0                                                                       |
| Cream-filled sweet biscuit, pre-packaged (g) | 359                         | 441                            | 0                                                                       |
| Muesli bar, pre-packaged (g)                 | 301                         | 315                            | 0                                                                       |
| Savoury flavoured crackers (g)               | 182                         | 199                            | 0                                                                       |
| Nuts, mixed, salted (g)                      | 154                         | 197                            | 0                                                                       |
| Confectionary (g)                            | 373                         | 365                            | 0                                                                       |
| Chocolate (g)                                | 333                         | 280                            | 0                                                                       |
| Potato crisps, pre-packaged (g)              | 420                         | 608                            | 0                                                                       |
| Salad dressing (g)                           | 187                         | 161                            | 0                                                                       |
| Tomato sauce (g)                             | 397                         | 375                            | 0                                                                       |
| Beef sausages (g)                            | 701                         | 670                            | 0                                                                       |
| Butter (g)                                   | 224                         | 109                            | 0                                                                       |
| Ham (g)                                      | 129                         | 110                            | 0                                                                       |
| Frozen lasagne, pre-packaged (g)             | 3298                        | 2828                           | 0                                                                       |
| Fish fillet crumbed, pre-packaged (g)        | 182                         | 247                            | 0                                                                       |
| Ice cream (g)                                | 1561                        | 1077                           | 0                                                                       |
| Total Discretionary Choices – other (g)      | 13661                       | 12377 (9% less than Original)  | 0                                                                       |
| <b>Alcoholic Drinks</b>                      |                             |                                |                                                                         |
| Beer, full strength (mL)                     | 428                         | 545                            | 0                                                                       |
| White wine, sparkling (mL)                   | 572                         | 433                            | 0                                                                       |
| Whisky (mL)                                  | 97                          | 371                            | 0                                                                       |
| Red wine (mL)                                | 491                         | 218                            | 0                                                                       |
| Total Alcoholic Drinks (mL)                  | 1588                        | 1567 (1% less than Original)   | 0                                                                       |
| <b>Takeaway foods</b>                        |                             |                                |                                                                         |
| Pizza, commercial (g)                        | 872                         | 1546                           | 0                                                                       |
| Meat pie, commercial (g)                     | 1194                        | 1099                           | 0                                                                       |
| Hamburger, commercial (g)                    | 1749                        | 1896                           | 0                                                                       |
| Potato chips, commercial (g)                 | 446                         | 631                            | 0                                                                       |
| Total Takeaway foods (g)                     | 4261                        | 5172 (21% more than Original)  | 0                                                                       |
| <b>Sugar sweetened drinks</b>                |                             |                                |                                                                         |
| Sugar-sweetened soft drink (mL)              | 8612                        | 13598 (58% more than Original) | 0                                                                       |
| <b>Artificially sweetened drinks</b>         |                             |                                |                                                                         |

| Food item                                               | Habitual Diet (g/fortnight) |                              | Recommended Diet (g/fortnight)<br>Original & Low SEG Healthy Diets ASAP |
|---------------------------------------------------------|-----------------------------|------------------------------|-------------------------------------------------------------------------|
|                                                         | Original Healthy Diets ASAP | Low SEG Healthy Diets ASAP   |                                                                         |
| Artificially sweetened soft drink (mL)                  | 1419                        | 561 (60% less than Original) | 0                                                                       |
| <b>Items allocated to more than one food group</b>      |                             |                              |                                                                         |
| Sandwich, pre-made, white bread, chicken and salad* (g) | 175                         | 442                          | 360                                                                     |
| Canned meat and vegetable casserole** (g)               | 864                         | 305                          | 0                                                                       |
| Orange fruit juice*** (mL)                              | 4734                        | 4453                         | 0                                                                       |

\*Divided equally between Grains etc, Lean meats etc, and Vegetables

\*\*Divided equally between Lean meats etc and Vegetables

\*\*\*Divided equally between Fruit and Discretionary choices - other

Table S4: Composition of the original Healthy Diets ASAP habitual diet pricing tool for mean Australian population and the Low SEG Healthy Diets ASAP habitual diet pricing tool, and recommended diet pricing tool for an older retired couple (Household D)

| Food item                                            | Habitual Diet (g/fortnight) |                              | Recommended Diet (g/fortnight)<br>Original & Low SEG Healthy Diets ASAP |
|------------------------------------------------------|-----------------------------|------------------------------|-------------------------------------------------------------------------|
|                                                      | Original Healthy Diets ASAP | Low SEG Healthy Diets ASAP   |                                                                         |
| <b>Energy (kJ/day)</b>                               | 14,536 kJ                   | 14,329 kJ                    | 15,095 kJ                                                               |
| <b>Water</b>                                         |                             |                              |                                                                         |
| Water, bottled (mL)                                  | 923                         | 471 (49% less than Original) | 923                                                                     |
| <b>Fruit</b>                                         |                             |                              |                                                                         |
| Apples (g)                                           | 1271                        | 1027                         | 2800                                                                    |
| Bananas (g)                                          | 743                         | 680                          | 2800                                                                    |
| Oranges (g)                                          | 791                         | 645                          | 2800                                                                    |
| Fruit salad, canned in juice (g)                     | 2017                        | 1980                         | 0                                                                       |
| Total Fruit (g)                                      | 5774                        | 5305 (8% less than Original) | 8400                                                                    |
| <b>Vegetables and Legumes</b>                        |                             |                              |                                                                         |
| Potato, loose (g)                                    | 1304                        | 1280                         | 800                                                                     |
| Broccoli, loose (g)                                  | 249                         | 267                          | 700                                                                     |
| White cabbage, loose (g)                             | 174                         | 125                          | 700                                                                     |
| Iceberg lettuce, whole (g)                           | 418                         | 353                          | 700                                                                     |
| Carrot, loose (g)                                    | 493                         | 442                          | 1050                                                                    |
| Pumpkin (g)                                          | 287                         | 287                          | 1050                                                                    |
| Onion, loose (g)                                     | 128                         | 141                          | 840                                                                     |
| Tomatoes, loose (g)                                  | 423                         | 461                          | 840                                                                     |
| Sweetcorn, canned (g)                                | 161                         | 151                          | 400                                                                     |
| Four bean mix, canned (g)                            | 36                          | 13                           | 375                                                                     |
| Diced tomatoes, canned (g)                           | 89                          | 98                           | 840                                                                     |
| Baked Beans, canned (g)                              | 243                         | 129                          | 375                                                                     |
| Frozen mixed vegetables (g)                          | 656                         | 686                          | 840                                                                     |
| Frozen peas (g)                                      | 234                         | 232                          | 840                                                                     |
| Total Vegetables and Legumes (g)                     | 5234                        | 5013 (4% less than Original) | 10350                                                                   |
| <b>Grain (Cereal) Foods – Wholegrain and Refined</b> |                             |                              |                                                                         |
| Wholemeal bread, pre-packaged (g)                    | 1055                        | 1057                         | 1280                                                                    |
| White bread, pre-packaged (g)                        | 1093                        | 1267                         | 256                                                                     |
| Rolled oats (g)                                      | 931                         | 1169                         | 2160                                                                    |
| Breakfast cereal, corn flakes (g)                    | 331                         | 307                          | 192                                                                     |
| Breakfast cereal, wheat biscuits (g)                 | 285                         | 201                          | 720                                                                     |

| Food item                                                                   | Habitual Diet (g/fortnight) |                               | Recommended Diet (g/fortnight)<br>Original & Low SEG Healthy Diets ASAP |
|-----------------------------------------------------------------------------|-----------------------------|-------------------------------|-------------------------------------------------------------------------|
|                                                                             | Original Healthy Diets ASAP | Low SEG Healthy Diets ASAP    |                                                                         |
| White pasta (g)                                                             | 351                         | 410                           | 480                                                                     |
| White rice (g)                                                              | 335                         | 425                           | 480                                                                     |
| Dry wheat crackers, water crackers (g)                                      | 62                          | 60                            | 224                                                                     |
| Total Grain (Cereal) Foods (g)                                              | 4471                        | 4925 (10% more than Original) | 5792                                                                    |
| <b>Lean Meats and Poultry, Fish, Eggs, Nuts and Seeds</b>                   |                             |                               |                                                                         |
| Tuna, canned in oil (g)                                                     | 542                         | 494                           | 934                                                                     |
| Beef mince, lean (g)                                                        | 173                         | 134                           | 433                                                                     |
| Lamb loin chops (g)                                                         | 262                         | 254                           | 433                                                                     |
| Beef rump steak (g)                                                         | 547                         | 443                           | 434                                                                     |
| Eggs (g)                                                                    | 515                         | 491                           | 1120                                                                    |
| Chicken, cooked whole (g)                                                   | 801                         | 818                           | 746                                                                     |
| Peanuts, roasted, unsalted (g)                                              | 0                           | 0                             | 420                                                                     |
| Total Lean Meats and Poultry, Fish, Eggs, Nuts and Seeds (g)                | 3179                        | 2982 (6% less than Original)  | 4520                                                                    |
| <b>Milk, Yoghurt, Cheese, and Alternatives</b>                              |                             |                               |                                                                         |
| Cheddar cheese, full fat (g)                                                | 250                         | 261                           | 520                                                                     |
| Cheddar cheese, reduced fat (g)                                             | 25                          | 26                            | 363                                                                     |
| Milk, full fat (mL)                                                         | 2027                        | 1976                          | 4532                                                                    |
| Milk, reduced fat (mL)                                                      | 2427                        | 2071                          | 9126                                                                    |
| Flavoured milk (mL)                                                         | 597                         | 482                           | 0                                                                       |
| Yoghurt, full fat, plain (g)                                                | 109                         | 114                           | 1813                                                                    |
| Yoghurt, flavoured reduced fat (g)                                          | 373                         | 350                           | 3650                                                                    |
| Total Milk, Yoghurt, Cheese, and Alternatives (g)                           | 5808                        | 5280 (9% less than Original)  | 20004                                                                   |
| <b>Unsaturated Oils and Spreads (or foods from which these are derived)</b> |                             |                               |                                                                         |
| Sunflower oil (mL)                                                          | 5                           | 3                             | 132                                                                     |
| Olive oil (mL)                                                              | 5                           | 3                             | 132                                                                     |
| Canola margarine (g)                                                        | 135                         | 140                           | 186                                                                     |
| Total Unsaturated Oils and Spreads (g)                                      | 145                         | 146 (1% more than Original)   | 450                                                                     |
| <b>Discretionary Choices – other</b>                                        |                             |                               |                                                                         |
| Chicken soup, canned (g)                                                    | 1789                        | 1794                          | 0                                                                       |
| Muffin, commercial (g)                                                      | 793                         | 741                           | 0                                                                       |

| Food item                                    | Habitual Diet (g/fortnight) |                              | Recommended Diet (g/fortnight)<br>Original & Low SEG Healthy Diets ASAP |
|----------------------------------------------|-----------------------------|------------------------------|-------------------------------------------------------------------------|
|                                              | Original Healthy Diets ASAP | Low SEG Healthy Diets ASAP   |                                                                         |
| Instant noodles, wheat based (g)             | 65                          | 90                           | 0                                                                       |
| White sugar (g)                              | 491                         | 604                          | 0                                                                       |
| Cream-filled sweet biscuit, pre-packaged (g) | 410                         | 393                          | 0                                                                       |
| Muesli bar, pre-packaged (g)                 | 46                          | 40                           | 0                                                                       |
| Savoury flavoured crackers (g)               | 58                          | 47                           | 0                                                                       |
| Nuts, mixed, salted (g)                      | 129                         | 127                          | 0                                                                       |
| Confectionary (g)                            | 123                         | 124                          | 0                                                                       |
| Chocolate (g)                                | 109                         | 126                          | 0                                                                       |
| Potato crisps, pre-packaged (g)              | 52                          | 68                           | 0                                                                       |
| Salad dressing (g)                           | 101                         | 71                           | 0                                                                       |
| Tomato sauce (g)                             | 216                         | 232                          | 0                                                                       |
| Beef sausages (g)                            | 545                         | 521                          | 0                                                                       |
| Butter (g)                                   | 188                         | 157                          | 0                                                                       |
| Ham (g)                                      | 103                         | 89                           | 0                                                                       |
| Frozen lasagne, pre-packaged (g)             | 787                         | 875                          | 0                                                                       |
| Fish fillet crumbed, pre-packaged (g)        | 252                         | 264                          | 0                                                                       |
| Ice cream (g)                                | 825                         | 852                          | 0                                                                       |
| Total Discretionary – other (g)              | 8034                        | 8188 (2% more than Original) | 0                                                                       |
| <b>Alcoholic Drinks</b>                      |                             |                              |                                                                         |
| Beer, full strength (mL)                     | 2262                        | 2314                         | 0                                                                       |
| White wine, sparkling (mL)                   | 907                         | 780                          | 0                                                                       |
| Whisky (mL)                                  | 166                         | 200                          | 0                                                                       |
| Red wine (mL)                                | 968                         | 674                          | 0                                                                       |

| Food item                                                | Habitual Diet (g/fortnight) |                              | Recommended Diet (g/fortnight)<br>Original & Low SEG Healthy Diets ASAP |
|----------------------------------------------------------|-----------------------------|------------------------------|-------------------------------------------------------------------------|
|                                                          | Original Healthy Diets ASAP | Low SEG Healthy Diets ASAP   |                                                                         |
| Total Alcoholic Drinks (mL)                              | 4303                        | 3968 (8% less than Original) | 0                                                                       |
| <b>Takeaway foods</b>                                    |                             |                              |                                                                         |
| Pizza, commercial (g)                                    | 169                         | 71                           | 0                                                                       |
| Meat pie, commercial (g)                                 | 439                         | 464                          | 0                                                                       |
| Hamburger, commercial (g)                                | 352                         | 434                          | 0                                                                       |
| Potato chips, commercial (g)                             | 134                         | 184                          | 0                                                                       |
| Total Takeaway foods (g)                                 | 1094                        | 1153 (5% more than Original) | 0                                                                       |
| <b>Sugar sweetened drinks</b>                            |                             |                              |                                                                         |
| Sugar-sweetened soft drink (mL)                          | 1535                        | 1501 (2% less than Original) | 0                                                                       |
| <b>Artificially sweetened drinks</b>                     |                             |                              |                                                                         |
| Artificially sweetened soft drink (mL)                   | 523                         | 382 (27% less than Original) | 0                                                                       |
| <b>Items allocated to more than one food group</b>       |                             |                              |                                                                         |
| Sandwich, pre-made, white bread, chicken, and salad* (g) | 84                          | 86                           | 320                                                                     |
| Canned meat and vegetable casserole** (g)                | 623                         | 639                          | 0                                                                       |
| Orange fruit juice*** (mL)                               | 1903                        | 1945                         | 0                                                                       |

\*Divided equally between Grains etc, Lean meats etc, and Vegetables

\*\*Divided equally between Lean meats etc and Vegetables

\*\*\*Divided equally between Fruit and Discretionary choices - other



Table S5: Composition of the original Healthy Diets ASAP habitual diet pricing tool for mean Australian population and the Low SEG Healthy Diets ASAP habitual diet pricing tool, and recommended diet pricing tool for a single adult male (Household E)

| Food item                                            | Habitual Diet (g/fortnight) |                            | Recommended Diet (g/fortnight)<br>Original & Low SEG Healthy Diets ASAP |
|------------------------------------------------------|-----------------------------|----------------------------|-------------------------------------------------------------------------|
|                                                      | Original Healthy Diets ASAP | Low SEG Healthy Diets ASAP |                                                                         |
| <b>Energy (kJ/day)</b>                               | 9712 kJ                     | 9093 kJ                    | 9338 kJ                                                                 |
| <b>Water</b>                                         |                             |                            |                                                                         |
| Water, bottled (mL)                                  | 2021                        | 1211                       | 2021                                                                    |
| <b>Fruit</b>                                         |                             |                            |                                                                         |
| Apples (g)                                           | 722                         | 831                        | 1400                                                                    |
| Bananas (g)                                          | 293                         | 181                        | 1400                                                                    |
| Oranges (g)                                          | 360                         | 411                        | 1400                                                                    |
| Fruit salad, canned in juice (g)                     | 621                         | 454                        | 0                                                                       |
| Total Fruit (g)                                      | 2656                        | 2317 (13% < Original)      | 4200                                                                    |
| <b>Vegetables and Legumes</b>                        |                             |                            |                                                                         |
| Potato, loose (g)                                    | 516                         | 889                        | 700                                                                     |
| Broccoli, loose (g)                                  | 144                         | 180                        | 350                                                                     |
| White cabbage, loose (g)                             | 94                          | 38                         | 350                                                                     |
| Iceberg lettuce, whole (g)                           | 327                         | 326                        | 350                                                                     |
| Carrot, loose (g)                                    | 170                         | 134                        | 525                                                                     |
| Pumpkin (g)                                          | 86                          | 41                         | 525                                                                     |
| Onion, loose (g)                                     | 48                          | 24                         | 420                                                                     |
| Tomatoes, loose (g)                                  | 187                         | 257                        | 420                                                                     |
| Sweetcorn, canned (g)                                | 77                          | 37                         | 350                                                                     |
| Four bean mix, canned (g)                            | 24                          | 19                         | 525                                                                     |
| Diced tomatoes, canned (g)                           | 94                          | 65                         | 420                                                                     |
| Baked Beans, canned (g)                              | 128                         | 141                        | 525                                                                     |
| Frozen mixed vegetables (g)                          | 424                         | 264                        | 420                                                                     |
| Frozen peas (g)                                      | 106                         | 206                        | 420                                                                     |
| Total Vegetables and Legumes (g)                     | 2698                        | 2870 (6% > Original)       | 6353                                                                    |
| <b>Grain (Cereal) Foods – Wholegrain and Refined</b> |                             |                            |                                                                         |
| Wholemeal bread, pre-packaged (g)                    | 370                         | 263                        | 1120                                                                    |
| White bread, pre-packaged (g)                        | 689                         | 824                        | 224                                                                     |
| Rolled oats (g)                                      | 255                         | 19                         | 1680                                                                    |
| Breakfast cereal, corn flakes (g)                    | 155                         | 220                        | 168                                                                     |
| Breakfast cereal, wheat biscuits (g)                 | 167                         | 83                         | 560                                                                     |

| Food item                                                                   | Habitual Diet (g/fortnight) |                            | Recommended Diet (g/fortnight)<br>Original & Low SEG Healthy Diets ASAP |
|-----------------------------------------------------------------------------|-----------------------------|----------------------------|-------------------------------------------------------------------------|
|                                                                             | Original Healthy Diets ASAP | Low SEG Healthy Diets ASAP |                                                                         |
| White pasta (g)                                                             | 384                         | 408                        | 543                                                                     |
| White rice (g)                                                              | 524                         | 656                        | 543                                                                     |
| Dry wheat crackers, water crackers (g)                                      | 33                          | 19                         | 196                                                                     |
| Total Grain (Cereal) Foods (g)                                              | 2640                        | 2499 (5% < Original)       | 5087                                                                    |
| <b>Lean Meats and Poultry, Fish, Eggs, Nuts and Seeds</b>                   |                             |                            |                                                                         |
| Tuna, canned in oil (g)                                                     | 297                         | 207                        | 467                                                                     |
| Beef mince, lean (g)                                                        | 111                         | 85                         | 303                                                                     |
| Lamb loin chops (g)                                                         | 174                         | 220                        | 303                                                                     |
| Beef rump steak (g)                                                         | 373                         | 350                        | 304                                                                     |
| Eggs (g)                                                                    | 306                         | 360                        | 560                                                                     |
| Chicken, cooked whole (g)                                                   | 657                         | 264                        | 373                                                                     |
| Peanuts, roasted, unsalted (g)                                              | 0                           | 0                          | 420                                                                     |
| Total Lean Meats and Poultry, Fish, Eggs, Nuts and Seeds (g)                | 2194                        | 1734 (21% < Original)      | 2783                                                                    |
| <b>Milk, Yoghurt, Cheese and Alternatives</b>                               |                             |                            |                                                                         |
| Cheddar cheese, full fat (g)                                                | 157                         | 173                        | 160                                                                     |
| Cheddar cheese, reduced fat (g)                                             | 15                          | 10                         | 120                                                                     |
| Milk, full fat (mL)                                                         | 1259                        | 1973                       | 1500                                                                    |
| Milk, reduced fat (mL)                                                      | 828                         | 539                        | 3000                                                                    |
| Flavoured milk (mL)                                                         | 888                         | 812                        | 0                                                                       |
| Yoghurt, full fat, plain (g)                                                | 77                          | 32                         | 600                                                                     |
| Yoghurt, flavoured reduced fat (g)                                          | 209                         | 125                        | 1200                                                                    |
| Total Milk, Yoghurt, Cheese and Alternatives (g)                            | 3432                        | 3663 (7% > Original)       | 6580                                                                    |
| <b>Unsaturated Oils and Spreads (or foods from which these are derived)</b> |                             |                            |                                                                         |
| Sunflower oil (mL)                                                          | 3                           | 7                          | 131                                                                     |
| Olive oil (mL)                                                              | 3                           | 7                          | 131                                                                     |
| Canola margarine (g)                                                        | 43                          | 48                         | 186                                                                     |
| Total Unsaturated Oils and Spreads (g)                                      | 49                          | 63 (29% > Original)        | 448                                                                     |
| <b>Discretionary Choices – other</b>                                        |                             |                            |                                                                         |
| Chicken soup, canned (g)                                                    | 625                         | 1343                       | 0                                                                       |
| Muffin, commercial (g)                                                      | 352                         | 256                        | 0                                                                       |

| Food item                                    | Habitual Diet (g/fortnight) |                            | Recommended Diet (g/fortnight)<br>Original & Low SEG Healthy Diets ASAP |
|----------------------------------------------|-----------------------------|----------------------------|-------------------------------------------------------------------------|
|                                              | Original Healthy Diets ASAP | Low SEG Healthy Diets ASAP |                                                                         |
| Instant noodles, wheat based (g)             | 79                          | 31                         | 0                                                                       |
| White sugar (g)                              | 194                         | 283                        | 0                                                                       |
| Cream-filled sweet biscuit, pre-packaged (g) | 136                         | 187                        | 0                                                                       |
| Muesli bar, pre-packaged (g)                 | 72                          | 23                         | 0                                                                       |
| Savoury flavoured crackers (g)               | 40                          | 8                          | 0                                                                       |
| Nuts, mixed, salted (g)                      | 102                         | 65                         | 0                                                                       |
| Confectionary (g)                            | 46                          | 30                         | 0                                                                       |
| Chocolate (g)                                | 108                         | 79                         | 0                                                                       |
| Potato crisps, pre-packaged (g)              | 98                          | 42                         | 0                                                                       |
| Salad dressing (g)                           | 90                          | 50                         | 0                                                                       |
| Tomato sauce (g)                             | 172                         | 136                        | 0                                                                       |
| Beef sausages (g)                            | 346                         | 365                        | 0                                                                       |
| Butter (g)                                   | 56                          | 85                         | 0                                                                       |
| Ham (g)                                      | 60                          | 33                         | 0                                                                       |
| Frozen lasagne, pre-packaged (g)             | 1024                        | 856                        | 0                                                                       |
| Fish fillet crumbed, pre-packaged (g)        | 120                         | 186                        | 0                                                                       |
| Ice cream (g)                                | 269                         | 230                        | 0                                                                       |
| Total Discretionary – other (g)              | 4946                        | 4728 (4% < Original)       | 0                                                                       |
| <b>Alcoholic Drinks</b>                      |                             |                            |                                                                         |
| Beer, full strength (mL)                     | 4232                        | 4515                       | 0                                                                       |
| White wine, sparkling (mL)                   | 291                         | 114                        | 0                                                                       |
| Whisky (mL)                                  | 170                         | 82                         | 0                                                                       |
| Red wine (mL)                                | 587                         | 301                        | 0                                                                       |
| Total Alcoholic Drinks (mL)                  | 5280                        | 5012 (5% < Original)       | 0                                                                       |
| <b>Takeaway foods</b>                        |                             |                            |                                                                         |
| Pizza, commercial (g)                        | 310                         | 254                        | 0                                                                       |
| Meat pie, commercial (g)                     | 444                         | 456                        | 0                                                                       |
| Hamburger, commercial (g)                    | 664                         | 814                        | 0                                                                       |
| Potato chips, commercial (g)                 | 225                         | 202                        | 0                                                                       |
| Total Takeaway foods (g)                     | 1642                        | 1726 (5% < Original)       | 0                                                                       |
| <b>Sugar sweetened drinks</b>                |                             |                            |                                                                         |
| Sugar-sweetened soft drink (mL)              | 3400                        | 2690 (21% < Original)      | 0                                                                       |
| <b>Artificially sweetened drinks0</b>        |                             |                            |                                                                         |

| Food item                                               | Habitual Diet (g/fortnight) |                            | Recommended Diet (g/fortnight)<br>Original & Low SEG Healthy Diets ASAP |
|---------------------------------------------------------|-----------------------------|----------------------------|-------------------------------------------------------------------------|
|                                                         | Original Healthy Diets ASAP | Low SEG Healthy Diets ASAP |                                                                         |
| Artificially sweetened soft drink (mL)                  | 972                         | 845 (13% < Original)       | 0                                                                       |
| <b>Items allocated to more than one food group</b>      |                             |                            |                                                                         |
| Sandwich, pre-made, white bread, chicken and salad* (g) | 186                         | 20                         | 160                                                                     |
| Canned meat and vegetable casserole** (g)               | 427                         | 481                        | 0                                                                       |
| Orange fruit juice*** (mL)                              | 1319                        | 879                        | 0                                                                       |

\*Divided equally between Grains etc, Lean meats etc, and Vegetables

\*\*Divided equally between Lean meats etc and Vegetables

\*\*\*Divided equally between Fruit and Discretionary choices - other

Table S6: Composition of the original Healthy Diets ASAP habitual diet pricing tool for mean Australian population and the Low SEG Healthy Diets ASAP habitual diet pricing tool, and recommended diet pricing tool for an older single female (Household F)

| Food item                                            | Habitual Diet (g/fortnight) |                            | Recommended Diet (g/fortnight)<br>Original & Low SEG Healthy Diets ASAP |
|------------------------------------------------------|-----------------------------|----------------------------|-------------------------------------------------------------------------|
|                                                      | Original Healthy Diets ASAP | Low SEG Healthy Diets ASAP |                                                                         |
| <b>Energy (kJ/day)</b>                               | 6441 kJ                     | 6136 kJ                    | 7095 kJ                                                                 |
| <b>Water</b>                                         |                             |                            |                                                                         |
| Water, bottled (mL)                                  | 434                         | 159 (63% < Original)       | 434                                                                     |
| <b>Fruit</b>                                         |                             |                            |                                                                         |
| Apples (g)                                           | 610                         | 468                        | 1400                                                                    |
| Bananas (g)                                          | 411                         | 377                        | 1400                                                                    |
| Oranges (g)                                          | 352                         | 335                        | 1400                                                                    |
| Fruit salad, canned in juice (g)                     | 914                         | 897                        | 0                                                                       |
| Total Fruit (g)                                      | 2767                        | 2607 (6% < Original)       | 4200                                                                    |
| <b>Vegetables and Legumes</b>                        |                             |                            |                                                                         |
| Potato, loose (g)                                    | 563                         | 562                        | 300                                                                     |
| Broccoli, loose (g)                                  | 151                         | 150                        | 350                                                                     |
| White cabbage, loose (g)                             | 75                          | 60                         | 350                                                                     |
| Iceberg lettuce, whole (g)                           | 234                         | 215                        | 350                                                                     |
| Carrot, loose (g)                                    | 249                         | 217                        | 525                                                                     |
| Pumpkin (g)                                          | 162                         | 162                        | 525                                                                     |
| Onion, loose (g)                                     | 38                          | 48                         | 420                                                                     |
| Tomatoes, loose (g)                                  | 176                         | 187                        | 420                                                                     |
| Sweetcorn, canned (g)                                | 97                          | 92                         | 150                                                                     |
| Four bean mix, canned (g)                            | 11                          | 6                          | 225                                                                     |
| Diced tomatoes, canned (g)                           | 36                          | 46                         | 420                                                                     |
| Baked Beans, canned (g)                              | 95                          | 80                         | 225                                                                     |
| Frozen mixed vegetables (g)                          | 330                         | 283                        | 420                                                                     |
| Frozen peas (g)                                      | 127                         | 136                        | 420                                                                     |
| Total Vegetables and Legumes (g)                     | 2467                        | 2383 (3% < Original)       | 5153                                                                    |
| <b>Grain (Cereal) Foods – Wholegrain and Refined</b> |                             |                            |                                                                         |
| Wholemeal bread, pre-packaged (g)                    | 474                         | 477                        | 440                                                                     |
| White bread, pre-packaged (g)                        | 433                         | 482                        | 96                                                                      |
| Rolled oats (g)                                      | 521                         | 601                        | 900                                                                     |
| Breakfast cereal, corn flakes (g)                    | 123                         | 109                        | 72                                                                      |
| Breakfast cereal, wheat biscuits (g)                 | 110                         | 81                         | 300                                                                     |

| Food item                                                                   | Habitual Diet (g/fortnight) |                            | Recommended Diet (g/fortnight)<br>Original & Low SEG Healthy Diets ASAP |
|-----------------------------------------------------------------------------|-----------------------------|----------------------------|-------------------------------------------------------------------------|
|                                                                             | Original Healthy Diets ASAP | Low SEG Healthy Diets ASAP |                                                                         |
| White pasta (g)                                                             | 141                         | 159                        | 180                                                                     |
| White rice (g)                                                              | 169                         | 181                        | 180                                                                     |
| Dry wheat crackers, water crackers (g)                                      | 38                          | 35                         | 84                                                                      |
| Total Grain (Cereal) Foods (g)                                              | 2015                        | 2134 (6% > Original)       | 2305                                                                    |
| <b>Lean Meats and Poultry, Fish, Eggs, Nuts and Seeds</b>                   |                             |                            |                                                                         |
| Tuna, canned in oil (g)                                                     | 282                         | 257                        | 467                                                                     |
| Beef mince, lean (g)                                                        | 89                          | 71                         | 130                                                                     |
| Lamb loin chops (g)                                                         | 158                         | 169                        | 130                                                                     |
| Beef rump steak (g)                                                         | 252                         | 205                        | 130                                                                     |
| Eggs (g)                                                                    | 257                         | 224                        | 560                                                                     |
| Chicken, cooked whole (g)                                                   | 378                         | 388                        | 373                                                                     |
| Peanuts, roasted, unsalted (g)                                              | 0                           | 0                          | 180                                                                     |
| Total Lean Meats and Poultry, Fish, Eggs, Nuts and Seeds (g)                | 1539                        | 1454 (6% < Original)       | 2023                                                                    |
| <b>Milk, Yoghurt, Cheese and Alternatives</b>                               |                             |                            |                                                                         |
| Cheddar cheese, full fat (g)                                                | 116                         | 109                        | 280                                                                     |
| Cheddar cheese, reduced fat (g)                                             | 19                          | 19                         | 198                                                                     |
| Milk, full fat (mL)                                                         | 914                         | 871                        | 2469                                                                    |
| Milk, reduced fat (mL)                                                      | 1234                        | 883                        | 4876                                                                    |
| Flavoured milk (mL)                                                         | 244                         | 235                        | 0                                                                       |
| Yoghurt, full fat, plain (g)                                                | 63                          | 61                         | 988                                                                     |
| Yoghurt, flavoured reduced fat (g)                                          | 233                         | 241                        | 1950                                                                    |
| Total Milk, Yoghurt, Cheese and Alternatives (g)                            | 2823                        | 2419 (14% < Original)      | 10761                                                                   |
| <b>Unsaturated Oils and Spreads (or foods from which these are derived)</b> |                             |                            |                                                                         |
| Sunflower oil (mL)                                                          | 2                           | 2                          | 66                                                                      |
| Olive oil (mL)                                                              | 2                           | 2                          | 66                                                                      |
| Canola margarine (g)                                                        | 60                          | 61                         | 93                                                                      |
| Total Unsaturated Oils and Spreads (g)                                      | 64                          | 66 (3% > Original)         | 225                                                                     |
| <b>Discretionary Choices – other</b>                                        |                             |                            |                                                                         |
| Chicken soup, canned (g)                                                    | 769                         | 859                        | 0                                                                       |
| Muffin, commercial (g)                                                      | 343                         | 299                        | 0                                                                       |
| Instant noodles, wheat based (g)                                            | 56                          | 70                         | 0                                                                       |

| Food item                                    | Habitual Diet (g/fortnight) |                            | Recommended Diet (g/fortnight)<br>Original & Low SEG Healthy Diets ASAP |
|----------------------------------------------|-----------------------------|----------------------------|-------------------------------------------------------------------------|
|                                              | Original Healthy Diets ASAP | Low SEG Healthy Diets ASAP |                                                                         |
| White sugar (g)                              | 185                         | 208                        | 0                                                                       |
| Cream-filled sweet biscuit, pre-packaged (g) | 204                         | 190                        | 0                                                                       |
| Muesli bar, pre-packaged (g)                 | 19                          | 14                         | 0                                                                       |
| Savoury flavoured crackers (g)               | 20                          | 9                          | 0                                                                       |
| Nuts, mixed, salted (g)                      | 54                          | 52                         | 0                                                                       |
| Confectionary (g)                            | 56                          | 59                         | 0                                                                       |
| Chocolate (g)                                | 49                          | 59                         | 0                                                                       |
| Potato crisps, pre-packaged (g)              | 25                          | 17                         | 0                                                                       |
| Salad dressing (g)                           | 65                          | 39                         | 0                                                                       |
| Tomato sauce (g)                             | 121                         | 135                        | 0                                                                       |
| Beef sausages (g)                            | 217                         | 188                        | 0                                                                       |
| Butter (g)                                   | 79                          | 47                         | 0                                                                       |
| Ham (g)                                      | 49                          | 35                         | 0                                                                       |
| Frozen lasagne, pre-packaged (g)             | 389                         | 430                        | 0                                                                       |
| Fish fillet crumbed, pre-packaged (g)        | 119                         | 124                        | 0                                                                       |
| Ice cream (g)                                | 307                         | 246                        | 0                                                                       |
| Total Discretionary – other (g)              | 3608                        | 3607 (same as Original)    | 0                                                                       |
| <b>Alcoholic Drinks</b>                      |                             |                            |                                                                         |
| Beer, full strength (mL)                     | 244                         | 409                        | 0                                                                       |
| White wine, sparkling (mL)                   | 514                         | 423                        | 0                                                                       |
| Whisky (mL)                                  | 90                          | 119                        | 0                                                                       |
| Red wine (mL)                                | 307                         | 268                        | 0                                                                       |
| Total Alcoholic Drinks (mL)                  | 1155                        | 1220 (6% > Original)       | 0                                                                       |
| <b>Takeaway foods</b>                        |                             |                            |                                                                         |
| Pizza, commercial (g)                        | 64                          | 15                         | 0                                                                       |
| Meat pie, commercial (g)                     | 125                         | 178                        | 0                                                                       |
| Hamburger, commercial (g)                    | 154                         | 169                        | 0                                                                       |
| Potato chips, commercial (g)                 | 62                          | 77                         | 0                                                                       |
| Total Takeaway foods (g)                     | 405                         | 440 (9% > Original)        | 0                                                                       |
| <b>Sugar sweetened drinks</b>                |                             |                            |                                                                         |
| Sugar-sweetened soft drink (mL)              | 617                         | 489 (21% < Original)       | 0                                                                       |
| <b>Artificially sweetened drinks</b>         |                             |                            |                                                                         |

| Food item                                               | Habitual Diet (g/fortnight) |                            | Recommended Diet (g/fortnight)<br>Original & Low SEG Healthy Diets ASAP |
|---------------------------------------------------------|-----------------------------|----------------------------|-------------------------------------------------------------------------|
|                                                         | Original Healthy Diets ASAP | Low SEG Healthy Diets ASAP |                                                                         |
| Artificially sweetened soft drink (mL)                  | 125                         | 75 (40% < Original)        | 0                                                                       |
| <b>Items allocated to more than one food group</b>      |                             |                            |                                                                         |
| Sandwich, pre-made, white bread, chicken and salad* (g) | 17                          | 29                         | 160                                                                     |
| Canned meat and vegetable casserole** (g)               | 233                         | 258                        | 0                                                                       |
| Orange fruit juice*** (mL)                              | 961                         | 1058                       | 0                                                                       |

\*Divided equally between Grains etc, Lean meats etc, and Vegetables

\*\*Divided equally between Lean meats etc and Vegetables

\*\*\*Divided equally between Fruit and Discretionary choices - other
