# Supplementary material for: Cost and Affordability of Habitual and Recommended Diets in Welfare-Dependent Households in Australia
Source: MDPI journal article supplement (doi:10.3390/nu16050659), 2024-02-26
Supplement: s1 [file s1]

Table S7: Calculations of welfare dependent fortnightly incomes<sup>1</sup> for the six welfare dependent households in April 2023 and September 2023

| Household                                | Two adults, senior female, 3 children (Household A) |                                          | Two adults, teen boy, child (Household B) |                                          | Adult female, teen boy, child (Household C) |                                          | Older, retired couple (Household D) |                            | Single adult male (Household E) |                 | Older single female (Household F) |                   |
|------------------------------------------|-----------------------------------------------------|------------------------------------------|-------------------------------------------|------------------------------------------|---------------------------------------------|------------------------------------------|-------------------------------------|----------------------------|---------------------------------|-----------------|-----------------------------------|-------------------|
|                                          | Apr 2023                                            | Sep 2023                                 | Apr 2023                                  | Sep 2023                                 | Apr 2023                                    | Sep 2023                                 | Apr 2023                            | Sep 2023                   | Apr 2023                        | Sep 2023        | Apr 2023                          | Sep 2023          |
| Unemployment Benefit                     | \$631.20 (adult male)                               | \$686.00 (adult male)                    | \$1,262.40 (\$631.20 for each adult)      | \$1,372.00 (\$686 for each adult)        | \$745.20                                    | n/a                                      | n/a                                 | n/a                        | \$693.10                        | \$749.20        | n/a                               | n/a               |
| Parenting Payment (Partnered)            | \$631.20 (adult female)                             | \$686.00 (adult female)                  | n/a                                       | n/a                                      | n/a                                         | n/a                                      | n/a                                 | n/a                        | n/a                             | n/a             | n/a                               | n/a               |
| Parenting Payment (Single)               | n/a                                                 | n/a                                      | n/a                                       | n/a                                      | n/a                                         | \$972.70                                 | n/a                                 | n/a                        | n/a                             | n/a             | n/a                               | n/a               |
| Family Tax Benefit A fortnightly payment | \$653.38                                            | \$704.20                                 | \$455.42                                  | \$490.84                                 | \$455.42                                    | \$490.84                                 | n/a                                 | n/a                        | n/a                             | n/a             | n/a                               | n/a               |
| Family Tax Benefit A annual supplement   | \$94.34 (\$817.60 per child, per annum)             | \$101.50 (\$879.65 per child, per annum) | \$62.89 (\$817.60 per child, per annum)   | \$67.67 (\$879.65 per child, per annum)  | \$62.89 (\$817.60 per child, per annum)     | \$67.67 (\$879.65 per child, per annum)  | n/a                                 | n/a                        | n/a                             | n/a             | n/a                               | n/a               |
| Family Tax Benefit B fortnightly payment | \$87.22                                             | \$92.82                                  | \$36.40                                   | \$37.94                                  | \$117.46                                    | \$126.56                                 | n/a                                 | n/a                        | n/a                             | n/a             | n/a                               | n/a               |
| Family Tax Benefit B annual supplement   | \$15.30 (\$397.85 per family, per annum)            | \$16.57 (\$430.70 per family, per annum) | \$15.30 (\$397.85 per family, per annum)  | \$16.57 (\$430.70 per family, per annum) | \$15.30 (\$397.85 per family, per annum)    | \$16.57 (\$430.70 per family, per annum) | n/a                                 | n/a                        | n/a                             | n/a             | n/a                               | n/a               |
| Age Pension                              | \$971.50 (senior female)                            | \$1002.50 (senior female)                | n/a                                       | n/a                                      | n/a                                         | n/a                                      | \$1,464.60 (\$732.30 each)          | \$1,511.40 (\$755.70 each) | n/a                             | n/a             | \$971.50                          | \$1002.50         |
| Age Pension Supplement                   | \$78.40 (senior female)                             | \$80.10 (senior female)                  | n/a                                       | n/a                                      | n/a                                         | n/a                                      | \$118.20 (\$59.10 each)             | \$120.80 (\$60.40 each)    | n/a                             | n/a             | \$78.40                           | \$80.10           |
| Clean Energy Supplement                  | \$29.90                                             | \$29.90                                  | \$15.80                                   | \$15.80                                  | \$9.50                                      | \$9.50                                   | \$21.20                             | \$21.20                    | \$8.80                          | \$8.80          | \$14.10                           | \$14.10           |
| Rent Assistance                          | n/a (public housing)                                | n/a (public housing)                     | \$184.94                                  | \$217.28                                 | \$184.94                                    | \$217.28                                 | \$148.00                            | \$174.00                   | \$83.70                         | \$117.45        | \$157.20                          | \$184.80          |
| <b>Fortnightly income Total</b>          | <b>\$3,192.44</b>                                   | <b>\$3,399.58</b>                        | <b>\$2,033.15</b>                         | <b>\$2,218.09</b>                        | <b>\$1,590.71</b>                           | <b>\$1,901.11</b>                        | <b>\$1,752.00</b>                   | <b>\$1,827.40</b>          | <b>\$785.60</b>                 | <b>\$875.45</b> | <b>\$1,221.20</b>                 | <b>\$1,281.50</b> |

n/a = not applicable 1. Services Australia. Payment and Service Finder 2023 Available from: <https://www.servicesaustralia.gov.au/>

Table S8: Diet cost and affordability by food group and food group components of habitual and recommended diets, for a two adult, senior female, three children household (Household A) in Greater Brisbane, April 2023

| Mean food group and food group component costs per fortnight for Greater Brisbane |                                  |                 |                                   |                                     |                 |                                   |                                  |                 |                                   |                                     |                 |                                   |                                   |                 |                                   |                                      |                 |                                   |
|-----------------------------------------------------------------------------------|----------------------------------|-----------------|-----------------------------------|-------------------------------------|-----------------|-----------------------------------|----------------------------------|-----------------|-----------------------------------|-------------------------------------|-----------------|-----------------------------------|-----------------------------------|-----------------|-----------------------------------|--------------------------------------|-----------------|-----------------------------------|
| Food group and food group component                                               | Broader population household     |                 |                                   |                                     |                 |                                   | Welfare dependent household      |                 |                                   |                                     |                 |                                   |                                   |                 |                                   |                                      |                 |                                   |
|                                                                                   | Habitual Diet – branded products |                 |                                   | Recommended Diet – branded products |                 |                                   | Habitual Diet – branded products |                 |                                   | Recommended Diet – branded products |                 |                                   | Habitual Diet – cheapest products |                 |                                   | Recommended Diet – cheapest products |                 |                                   |
|                                                                                   | Cost (A\$)                       | Std Error (A\$) | Proportion of total diet cost (%) | Cost (A\$)                          | Std Error (A\$) | Proportion of total diet cost (%) | Cost (A\$)                       | Std Error (A\$) | Proportion of total diet cost (%) | Cost (A\$)                          | Std Error (A\$) | Proportion of total diet cost (%) | Cost (A\$)                        | Std Error (A\$) | Proportion of total diet cost (%) | Cost (A\$)                           | Std Error (A\$) | Proportion of total diet cost (%) |
| Water                                                                             | \$23.83                          | \$0.59          | 1.9%                              | \$23.83                             | \$0.59          | 2.2%                              | \$15.80                          | \$0.39          | 1.3%                              | \$23.83                             | \$0.59          | 2.2%                              | \$5.48                            | <\$0.01         | 0.7%                              | \$8.26                               | <\$0.01         | 1.1%                              |
| Fruit                                                                             | \$113.90                         | \$2.04          | 9.1%                              | \$145.38                            | \$5.92          | 13.7%                             | \$96.76                          | \$1.63          | 7.9%                              | \$145.38                            | \$5.92          | 13.7%                             | \$74.02                           | \$0.41          | 9.2%                              | \$139.55                             | \$1.91          | 19.0%                             |
| Veg. & Legumes                                                                    | \$74.22                          | \$0.91          | 5.9%                              | \$181.21                            | \$2.60          | 17.1%                             | \$68.84                          | \$0.75          | 5.6%                              | \$181.21                            | \$2.60          | 17.1%                             | \$55.55                           | \$0.28          | 6.9%                              | \$138.98                             | \$0.71          | 18.9%                             |
| Grains & Cereals                                                                  | \$80.27                          | \$1.22          | 6.4%                              | \$173.61                            | \$2.83          | 16.3%                             | \$72.61                          | \$1.15          | 5.9%                              | \$173.61                            | \$2.83          | 16.3%                             | \$35.82                           | \$0.21          | 4.5%                              | \$72.84                              | \$0.21          | 9.9%                              |
| Meats, nuts, seeds, egg & alternatives                                            | \$165.54                         | \$1.90          | 13.3%                             | \$304.07                            | \$3.23          | 28.6%                             | \$147.41                         | \$1.67          | 12.0%                             | \$304.07                            | \$3.23          | 28.6%                             | \$117.06                          | \$0.55          | 14.6%                             | \$236.46                             | \$1.02          | 32.2%                             |
| Milk, yoghurt, cheese & alternatives                                              | \$101.35                         | \$0.88          | 8.1%                              | \$218.21                            | \$1.99          | 20.5%                             | \$92.95                          | \$0.77          | 7.6%                              | \$218.21                            | \$1.99          | 20.5%                             | \$61.41                           | \$0.33          | 7.7%                              | \$130.16                             | \$0.92          | 17.7%                             |
| Unsaturated oils & spreads                                                        | \$3.03                           | \$0.05          | 0.2%                              | \$16.41                             | \$0.22          | 1.5%                              | \$3.90                           | \$0.06          | 0.3%                              | \$16.41                             | \$0.22          | 1.5%                              | \$1.80                            | \$0.04          | 0.2%                              | \$8.47                               | \$0.06          | 1.2%                              |
| Artificially sweetened soft drink                                                 | \$7.67                           | \$0.09          | 0.6%                              | --                                  | --              | --                                | \$4.28                           | \$0.05          | 0.3%                              | --                                  | --              | --                                | \$1.29                            | <\$0.01         | 0.2%                              | --                                   | --              | --                                |
| Discretionary choices - other                                                     | \$312.46                         | \$2.47          | 25.0%                             | --                                  | --              | --                                | \$294.77                         | \$2.23          | 24.1%                             | --                                  | --              | --                                | \$166.73                          | \$0.36          | 20.8%                             | --                                   | --              | --                                |
| Alcoholic drinks                                                                  | \$114.44                         | \$0.62          | 9.2%                              | --                                  | --              | --                                | \$114.80                         | \$0.66          | 9.4%                              | --                                  | --              | --                                | \$85.41                           | \$1.53          | 10.7%                             | --                                   | --              | --                                |
| Take-away foods                                                                   | \$212.46                         | \$1.60          | 17.0%                             | --                                  | --              | --                                | \$259.98                         | \$1.75          | 21.2%                             | --                                  | --              | --                                | \$180.10                          | \$2.09          | 22.5%                             | --                                   | --              | --                                |
| Sugar sweetened soft drinks                                                       | \$39.07                          | \$0.45          | 3.1%                              | --                                  | --              | --                                | \$53.09                          | \$0.61          | 4.3%                              | --                                  | --              | --                                | \$15.91                           | <\$0.01         | 2.0%                              | --                                   | --              | --                                |
| <b>Total cost</b>                                                                 | <b>\$1,248.26</b>                | <b>\$8.56</b>   | <b>100%</b>                       | <b>\$1,062.72</b>                   | <b>\$13.93</b>  | <b>100%</b>                       | <b>\$1,225.19</b>                | <b>\$7.80</b>   | <b>100%</b>                       | <b>\$1,062.72</b>                   | <b>\$13.93</b>  | <b>100%</b>                       | <b>\$800.57</b>                   | <b>\$2.62</b>   | <b>100%</b>                       | <b>\$734.72</b>                      | <b>\$2.42</b>   | <b>100%</b>                       |
| Healthy foods and drinks                                                          | \$569.82                         | \$6.10          | 45.6%                             | \$1,062.72                          | \$13.92         | 100%                              | \$502.55                         | \$5.07          | 41.0%                             | \$1,062.72                          | \$13.92         | 100%                              | \$352.42                          | \$0.86          | 44.0%                             | \$734.72                             | \$2.42          | 100%                              |
| Discretionary foods and drinks                                                    | \$678.44                         | \$3.39          | 54.4%                             | --                                  | --              | --                                | \$722.64                         | \$3.52          | 59.0%                             | --                                  | --              | --                                | \$448.15                          | \$2.45          | 56.0%                             | --                                   | --              | --                                |

| Affordability of diets                                         |                                  |           |                                     |           |                                  |           |                                     |           |                                   |           |                                      |           |
|----------------------------------------------------------------|----------------------------------|-----------|-------------------------------------|-----------|----------------------------------|-----------|-------------------------------------|-----------|-----------------------------------|-----------|--------------------------------------|-----------|
| Income amount (A\$)                                            | Broader population household     |           |                                     |           | Welfare dependent household      |           |                                     |           |                                   |           |                                      |           |
|                                                                | Habitual Diet – branded products |           | Recommended Diet – branded products |           | Habitual Diet – branded products |           | Recommended Diet – branded products |           | Habitual Diet – cheapest products |           | Recommended Diet – cheapest products |           |
|                                                                | Affordability                    | Std error | Affordability                       | Std error | Affordability                    | Std error | Affordability                       | Std error | Affordability                     | Std error | Affordability                        | Std error |
| April 2023 Welfare only household income \$3,192 per fortnight | 39.10%                           | 0.27%     | 33.29%                              | 0.44%     | 38.38%                           | 0.25%     | 33.29%                              | 0.44%     | 25.08%                            | 0.08%     | 23.01%                               | 0.08%     |

Table S9: Diet cost and affordability by food group and food group components of habitual and recommended diets, for a two adult, two children household (Household B) in Greater Brisbane, April 2023

| Mean food group and food group component costs per fortnight for Greater Brisbane |                                  |                 |                                   |                                     |                 |                                   |                                  |                 |                                   |                                     |                 |                                   |                                   |                 |                                   |                                      |                 |                                   |
|-----------------------------------------------------------------------------------|----------------------------------|-----------------|-----------------------------------|-------------------------------------|-----------------|-----------------------------------|----------------------------------|-----------------|-----------------------------------|-------------------------------------|-----------------|-----------------------------------|-----------------------------------|-----------------|-----------------------------------|--------------------------------------|-----------------|-----------------------------------|
| Food group and food group component                                               | Broader population household     |                 |                                   |                                     |                 |                                   | Welfare dependent household      |                 |                                   |                                     |                 |                                   |                                   |                 |                                   |                                      |                 |                                   |
|                                                                                   | Habitual Diet – branded products |                 |                                   | Recommended Diet – branded products |                 |                                   | Habitual Diet – branded products |                 |                                   | Recommended Diet – branded products |                 |                                   | Habitual Diet – cheapest products |                 |                                   | Recommended Diet – cheapest products |                 |                                   |
|                                                                                   | Cost (A\$)                       | Std Error (A\$) | Proportion of total diet cost (%) | Cost (A\$)                          | Std Error (A\$) | Proportion of total diet cost (%) | Cost (A\$)                       | Std Error (A\$) | Proportion of total diet cost (%) | Cost (A\$)                          | Std Error (A\$) | Proportion of total diet cost (%) | Cost (A\$)                        | Std Error (A\$) | Proportion of total diet cost (%) | Cost (A\$)                           | Std Error (A\$) | Proportion of total diet cost (%) |
| Water                                                                             | \$21.22                          | \$0.52          | 2.3%                              | \$21.22                             | \$0.52          | 2.8%                              | \$13.96                          | \$0.34          | 1.5%                              | \$21.22                             | \$0.52          | 2.8%                              | \$4.84                            | <\$0.01         | 0.8%                              | \$7.36                               | <\$0.00         | 1.4%                              |
| Fruit                                                                             | \$69.91                          | \$1.33          | 7.6%                              | \$100.35                            | \$4.08          | 13.3%                             | \$58.43                          | \$1.02          | 6.5%                              | \$100.35                            | \$4.08          | 13.3%                             | \$44.99                           | \$0.26          | 7.6%                              | \$96.32                              | \$1.32          | 18.5%                             |
| Veg. & Legumes                                                                    | \$51.67                          | \$0.63          | 5.6%                              | \$126.68                            | \$1.78          | 16.7%                             | \$47.43                          | \$0.51          | 5.3%                              | \$126.68                            | \$1.78          | 16.7%                             | \$38.59                           | \$0.19          | 6.5%                              | \$96.91                              | \$0.49          | 18.6%                             |
| Grains & Cereals                                                                  | \$54.76                          | \$0.80          | 6.0%                              | \$133.63                            | \$2.18          | 17.7%                             | \$46.53                          | \$0.72          | 5.2%                              | \$133.63                            | \$2.18          | 17.7%                             | \$23.84                           | \$0.15          | 4.0%                              | \$55.73                              | \$0.17          | 10.7%                             |
| Meats, nuts, seeds, egg & alternatives                                            | \$118.04                         | \$1.40          | 12.9%                             | \$223.38                            | \$2.36          | 29.5%                             | \$104.61                         | \$1.22          | 11.6%                             | \$223.38                            | \$2.36          | 29.5%                             | \$83.64                           | \$0.40          | 14.1%                             | \$176.12                             | \$0.76          | 33.7%                             |
| Milk, yoghurt, cheese & alternatives                                              | \$65.85                          | \$0.57          | 7.2%                              | \$138.97                            | \$1.26          | 18.4%                             | \$66.05                          | \$0.56          | 7.3%                              | \$138.97                            | \$1.26          | 18.4%                             | \$44.00                           | \$0.25          | 7.4%                              | \$82.96                              | \$0.58          | 15.9%                             |
| Unsaturated oils & spreads                                                        | \$1.97                           | \$0.03          | 0.2%                              | \$12.56                             | \$0.17          | 1.7%                              | \$2.48                           | \$0.04          | 0.3%                              | \$12.56                             | \$0.17          | 1.7%                              | \$1.15                            | \$0.03          | 0.2%                              | \$6.49                               | \$0.05          | 1.2%                              |
| Artificially sweetened soft drink                                                 | \$6.89                           | \$0.08          | 0.8%                              | --                                  | --              | --                                | \$4.05                           | \$0.05          | 0.4%                              | --                                  | --              | --                                | \$1.22                            | <\$0.01         | 0.2%                              | --                                   | --              | --                                |
| Discretionary choices - other                                                     | \$220.56                         | \$1.90          | 24.0%                             | --                                  | --              | --                                | \$208.66                         | \$1.71          | 23.1%                             | --                                  | --              | --                                | \$116.99                          | \$0.23          | 19.8%                             | --                                   | --              | --                                |
| Alcoholic drinks                                                                  | \$93.59                          | \$0.49          | 10.2%                             | --                                  | --              | --                                | \$92.56                          | \$0.54          | 10.3%                             | --                                  | --              | --                                | \$70.66                           | \$1.45          | 12.0%                             | --                                   | --              | --                                |
| Take-away foods                                                                   | \$178.95                         | \$1.33          | 19.5%                             | --                                  | --              | --                                | \$211.04                         | \$1.40          | 23.4%                             | --                                  | --              | --                                | \$147.22                          | \$1.67          | 24.9%                             | --                                   | --              | --                                |
| Sugar sweetened soft drinks                                                       | \$34.73                          | \$0.40          | 3.8%                              | --                                  | --              | --                                | \$47.09                          | \$0.54          | 5.2%                              | --                                  | --              | --                                | \$14.12                           | <\$0.01         | 2.4%                              | --                                   | --              | --                                |
| <b>Total cost</b>                                                                 | <b>\$918.14</b>                  | <b>\$6.14</b>   | <b>100%</b>                       | <b>\$756.80</b>                     | <b>\$9.87</b>   | <b>100%</b>                       | <b>\$902.90</b>                  | <b>\$5.59</b>   | <b>100%</b>                       | <b>\$756.80</b>                     | <b>\$9.87</b>   | <b>100%</b>                       | <b>\$591.26</b>                   | <b>\$2.18</b>   | <b>100%</b>                       | <b>\$521.88</b>                      | <b>\$1.69</b>   | <b>100%</b>                       |
| Healthy foods and drinks                                                          | \$390.31                         | \$4.24          | 42.5%                             | \$756.80                            | \$9.87          | 100%                              | \$343.55                         | \$3.46          | 38.0%                             | \$756.80                            | \$9.87          | 100%                              | \$242.26                          | \$0.61          | 41.0%                             | \$521.88                             | \$1.69          | 100%                              |
| Discretionary foods and drinks                                                    | \$527.82                         | \$2.69          | 57.5%                             | --                                  | --              | --                                | \$559.35                         | \$2.77          | 62.0%                             | --                                  | --              | --                                | \$349.00                          | \$2.09          | 59.0%                             | --                                   | --              | --                                |

| Affordability of diets                                         |                                  |           |                                     |           |                                  |           |                                     |           |                                   |           |                                      |           |
|----------------------------------------------------------------|----------------------------------|-----------|-------------------------------------|-----------|----------------------------------|-----------|-------------------------------------|-----------|-----------------------------------|-----------|--------------------------------------|-----------|
| Income amount (A\$)                                            | Broader population household     |           |                                     |           | Welfare dependent household      |           |                                     |           |                                   |           |                                      |           |
|                                                                | Habitual Diet – branded products |           | Recommended Diet – branded products |           | Habitual Diet – branded products |           | Recommended Diet – branded products |           | Habitual Diet – cheapest products |           | Recommended Diet – cheapest products |           |
|                                                                | Affordability                    | Std error | Affordability                       | Std error | Affordability                    | Std error | Affordability                       | Std error | Affordability                     | Std error | Affordability                        | Std error |
| April 2023 Welfare only household income \$2,033 per fortnight | 45.16%                           | 0.30%     | 37.22%                              | 0.49%     | 44.41%                           | 0.27%     | 37.22%                              | 0.49%     | 29.08%                            | 0.11%     | 25.67%                               | 0.08%     |

Table S10: Diet cost and affordability by food group and food group components of habitual and recommended diets, for an adult female, two children household (Household C) in Greater Brisbane, April 2023

| Mean food group and food group component costs per fortnight for Greater Brisbane |                                  |                 |                                   |                                     |                 |                                   |                                  |                 |                                   |                                     |                 |                                   |                                   |                 |                                   |                                      |                 |                                   |
|-----------------------------------------------------------------------------------|----------------------------------|-----------------|-----------------------------------|-------------------------------------|-----------------|-----------------------------------|----------------------------------|-----------------|-----------------------------------|-------------------------------------|-----------------|-----------------------------------|-----------------------------------|-----------------|-----------------------------------|--------------------------------------|-----------------|-----------------------------------|
| Food group and food group component                                               | Broader population household     |                 |                                   |                                     |                 |                                   | Welfare dependent household      |                 |                                   |                                     |                 |                                   |                                   |                 |                                   |                                      |                 |                                   |
|                                                                                   | Habitual Diet – branded products |                 |                                   | Recommended Diet – branded products |                 |                                   | Habitual Diet – branded products |                 |                                   | Recommended Diet – branded products |                 |                                   | Habitual Diet – cheapest products |                 |                                   | Recommended Diet – cheapest products |                 |                                   |
|                                                                                   | Cost (A\$)                       | Std Error (A\$) | Proportion of total diet cost (%) | Cost (A\$)                          | Std Error (A\$) | Proportion of total diet cost (%) | Cost (A\$)                       | Std Error (A\$) | Proportion of total diet cost (%) | Cost (A\$)                          | Std Error (A\$) | Proportion of total diet cost (%) | Cost (A\$)                        | Std Error (A\$) | Proportion of total diet cost (%) | Cost (A\$)                           | Std Error (A\$) | Proportion of total diet cost (%) |
| Water                                                                             | \$13.12                          | \$0.32          | 2.2%                              | \$13.12                             | \$0.32          | 2.4%                              | \$9.11                           | \$0.22          | 1.5%                              | \$13.12                             | \$0.32          | 2.4%                              | \$3.16                            | <\$0.01         | 0.8%                              | \$4.55                               | <\$0.01         | 1.2%                              |
| Fruit                                                                             | \$52.58                          | \$1.02          | 8.6%                              | \$74.62                             | \$3.04          | 13.4%                             | \$43.33                          | \$0.70          | 7.0%                              | \$74.62                             | \$3.04          | 13.4%                             | \$32.90                           | \$0.17          | 8.3%                              | \$71.63                              | \$0.98          | 18.7%                             |
| Veg. & Legumes                                                                    | \$32.42                          | \$0.39          | 5.3%                              | \$90.92                             | \$1.33          | 16.4%                             | \$29.05                          | \$0.29          | 4.7%                              | \$90.92                             | \$1.33          | 16.4%                             | \$24.27                           | \$0.12          | 6.1%                              | \$70.64                              | \$0.36          | 18.4%                             |
| Grains & Cereals                                                                  | \$39.05                          | \$0.59          | 6.4%                              | \$99.33                             | \$1.63          | 17.9%                             | \$34.64                          | \$0.52          | 5.6%                              | \$99.33                             | \$1.63          | 17.9%                             | \$18.36                           | \$0.10          | 4.7%                              | \$41.26                              | \$0.12          | 10.7%                             |
| Meats, nuts, seeds, egg & alternatives                                            | \$73.59                          | \$0.92          | 12.1%                             | \$164.12                            | \$1.75          | 29.6%                             | \$65.81                          | \$0.79          | 10.6%                             | \$164.12                            | \$1.75          | 29.6%                             | \$51.68                           | \$0.25          | 13.1%                             | \$128.98                             | \$0.57          | 33.6%                             |
| Milk, yoghurt, cheese & alternatives                                              | \$46.84                          | \$0.39          | 7.7%                              | \$106.18                            | \$0.96          | 19.1%                             | \$47.42                          | \$0.39          | 7.6%                              | \$106.18                            | \$0.96          | 19.1%                             | \$31.28                           | \$0.17          | 7.9%                              | \$63.35                              | \$0.45          | 16.5%                             |
| Unsaturated oils & spreads                                                        | \$1.44                           | \$0.02          | 0.2%                              | \$6.90                              | \$0.09          | 1.2%                              | \$1.75                           | \$0.03          | 0.3%                              | \$6.90                              | \$0.09          | 1.2%                              | \$0.80                            | \$0.02          | 0.2%                              | \$3.56                               | \$0.03          | 0.9%                              |
| Artificially sweetened soft drink                                                 | \$4.09                           | \$0.05          | 0.7%                              | --                                  | --              | --                                | \$1.62                           | \$0.02          | 0.3%                              | --                                  | --              | --                                | \$0.49                            | <\$0.01         | 0.1%                              | --                                   | --              | --                                |
| Discretionary choices - other                                                     | \$164.29                         | \$1.42          | 27.0%                             | --                                  | --              | --                                | \$154.74                         | \$1.27          | 24.8%                             | --                                  | --              | --                                | \$83.89                           | \$0.16          | 21.2%                             | --                                   | --              | --                                |
| Alcoholic drinks                                                                  | \$27.78                          | \$0.19          | 4.6%                              | --                                  | --              | --                                | \$38.13                          | \$0.42          | 6.1%                              | --                                  | --              | --                                | \$29.43                           | \$0.19          | 7.5%                              | --                                   | --              | --                                |
| Take-away foods                                                                   | \$128.94                         | \$0.95          | 21.2%                             | --                                  | --              | --                                | \$157.88                         | \$1.02          | 25.4%                             | --                                  | --              | --                                | \$106.76                          | \$1.24          | 27.0%                             | --                                   | --              | --                                |
| Sugar sweetened soft drinks                                                       | \$24.90                          | \$0.29          | 4.1%                              | --                                  | --              | --                                | \$39.31                          | \$0.45          | 6.3%                              | --                                  | --              | --                                | \$11.78                           | <\$0.01         | 3.0%                              | --                                   | --              | --                                |
| <b>Total cost</b>                                                                 | <b>\$609.05</b>                  | <b>\$4.31</b>   | <b>100%</b>                       | <b>\$555.19</b>                     | <b>\$7.26</b>   | <b>100%</b>                       | <b>\$622.79</b>                  | <b>\$3.96</b>   | <b>100%</b>                       | <b>\$555.19</b>                     | <b>\$7.26</b>   | <b>100%</b>                       | <b>\$394.81</b>                   | <b>\$1.24</b>   | <b>100%</b>                       | <b>\$383.97</b>                      | <b>\$1.25</b>   | <b>100%</b>                       |
| Healthy foods and drinks                                                          | \$263.14                         | \$2.92          | 43.2%                             | \$555.19                            | \$7.26          | 100%                              | \$232.72                         | \$2.29          | 37.4%                             | \$555.19                            | \$7.26          | 100%                              | \$162.93                          | \$0.37          | 41.3%                             | \$383.97                             | \$1.25          | 100%                              |
| Discretionary foods and drinks                                                    | \$345.91                         | \$1.92          | 56.8%                             | --                                  | --              | --                                | \$390.06                         | \$2.10          | 62.6%                             | --                                  | --              | --                                | \$231.87                          | \$1.31          | 58.7%                             | --                                   | --              | --                                |

| Affordability of diets                                         |                                  |           |                                     |           |                                  |           |                                     |           |                                   |           |                                      |           |
|----------------------------------------------------------------|----------------------------------|-----------|-------------------------------------|-----------|----------------------------------|-----------|-------------------------------------|-----------|-----------------------------------|-----------|--------------------------------------|-----------|
| Income amount (A\$)                                            | Broader population household     |           |                                     |           | Welfare dependent household      |           |                                     |           |                                   |           |                                      |           |
|                                                                | Habitual Diet – branded products |           | Recommended Diet – branded products |           | Habitual Diet – branded products |           | Recommended Diet – branded products |           | Habitual Diet – cheapest products |           | Recommended Diet – cheapest products |           |
|                                                                | Affordability                    | Std error | Affordability                       | Std error | Affordability                    | Std error | Affordability                       | Std error | Affordability                     | Std error | Affordability                        | Std error |
| April 2023 Welfare only household income \$1,591 per fortnight | 38.29%                           | 0.27%     | 34.90%                              | 0.46%     | 39.15%                           | 0.25%     | 34.90%                              | 0.46%     | 24.82%                            | 0.08%     | 24.14%                               | 0.08%     |

Table S11: Diet cost and affordability by food group and food group components of habitual and recommended diets, for an older retired couple household (Household D) in Greater Brisbane, April 2023

| Mean food group and food group component costs per fortnight for Greater Brisbane |                                  |                 |                                   |                                     |                 |                                   |                                  |                 |                                   |                                     |                 |                                   |                                   |                 |                                   |                                      |                 |                                   |
|-----------------------------------------------------------------------------------|----------------------------------|-----------------|-----------------------------------|-------------------------------------|-----------------|-----------------------------------|----------------------------------|-----------------|-----------------------------------|-------------------------------------|-----------------|-----------------------------------|-----------------------------------|-----------------|-----------------------------------|--------------------------------------|-----------------|-----------------------------------|
| Food group and food group component                                               | Broader population household     |                 |                                   |                                     |                 |                                   | Welfare dependent household      |                 |                                   |                                     |                 |                                   |                                   |                 |                                   |                                      |                 |                                   |
|                                                                                   | Habitual Diet – branded products |                 |                                   | Recommended Diet – branded products |                 |                                   | Habitual Diet – branded products |                 |                                   | Recommended Diet – branded products |                 |                                   | Habitual Diet – cheapest products |                 |                                   | Recommended Diet – cheapest products |                 |                                   |
|                                                                                   | Cost (A\$)                       | Std Error (A\$) | Proportion of total diet cost (%) | Cost (A\$)                          | Std Error (A\$) | Proportion of total diet cost (%) | Cost (A\$)                       | Std Error (A\$) | Proportion of total diet cost (%) | Cost (A\$)                          | Std Error (A\$) | Proportion of total diet cost (%) | Cost (A\$)                        | Std Error (A\$) | Proportion of total diet cost (%) | Cost (A\$)                           | Std Error (A\$) | Proportion of total diet cost (%) |
| Water                                                                             | \$3.70                           | \$0.09          | 1.0%                              | \$3.70                              | \$0.09          | 1.0%                              | \$1.89                           | \$0.05          | 0.5%                              | \$3.70                              | \$0.09          | 1.0%                              | \$0.65                            | <\$0.01         | 0.3%                              | \$1.28                               | <\$0.01         | 0.5%                              |
| Fruit                                                                             | \$41.60                          | \$0.67          | 10.7%                             | \$51.46                             | \$2.09          | 14.2%                             | \$38.52                          | \$0.57          | 10.3%                             | \$51.46                             | \$2.09          | 14.2%                             | \$28.73                           | \$0.18          | 11.5%                             | \$49.40                              | \$0.67          | 19.5%                             |
| Veg. & Legumes                                                                    | \$31.61                          | \$0.38          | 8.2%                              | \$59.66                             | \$0.87          | 16.5%                             | \$30.56                          | \$0.38          | 8.2%                              | \$59.66                             | \$0.87          | 16.5%                             | \$24.05                           | \$0.15          | 9.6%                              | \$46.06                              | \$0.24          | 18.2%                             |
| Grains & Cereals                                                                  | \$28.37                          | \$0.49          | 7.3%                              | \$42.98                             | \$0.69          | 11.9%                             | \$30.38                          | \$0.56          | 8.2%                              | \$42.98                             | \$0.69          | 11.9%                             | \$13.07                           | \$0.07          | 5.2%                              | \$18.94                              | \$0.05          | 7.5%                              |
| Meats, nuts, seeds, egg & alternatives                                            | \$66.48                          | \$0.77          | 17.2%                             | \$97.39                             | \$1.04          | 26.9%                             | \$60.11                          | \$0.69          | 16.1%                             | \$97.39                             | \$1.04          | 26.9%                             | \$46.70                           | \$0.21          | 18.7%                             | \$74.23                              | \$0.31          | 29.3%                             |
| Milk, yoghurt, cheese & alternatives                                              | \$26.82                          | \$0.22          | 6.9%                              | \$100.60                            | \$0.91          | 27.8%                             | \$25.28                          | \$0.21          | 6.8%                              | \$100.60                            | \$0.91          | 27.8%                             | \$16.41                           | \$0.08          | 6.6%                              | \$60.16                              | \$0.42          | 23.8%                             |
| Unsaturated oils & spreads                                                        | \$1.55                           | \$0.03          | 0.4%                              | \$5.69                              | \$0.08          | 1.6%                              | \$1.55                           | \$0.03          | 0.4%                              | \$5.69                              | \$0.08          | 1.6%                              | \$0.70                            | \$0.02          | 0.3%                              | \$2.94                               | \$0.02          | 1.2%                              |
| Artificially sweetened soft drink                                                 | \$1.51                           | \$0.02          | 0.4%                              | --                                  | --              | --                                | \$1.10                           | \$0.01          | 0.3%                              | --                                  | --              | --                                | \$0.33                            | <\$0.01         | 0.1%                              | --                                   | --              | --                                |
| Discretionary choices - other                                                     | \$85.77                          | \$0.54          | 22.2%                             | --                                  | --              | --                                | \$86.39                          | \$0.55          | 23.2%                             | --                                  | --              | --                                | \$54.09                           | \$0.18          | 21.6%                             | --                                   | --              | --                                |
| Alcoholic drinks                                                                  | \$63.52                          | \$0.40          | 16.4%                             | --                                  | --              | --                                | \$58.01                          | \$0.32          | 15.6%                             | --                                  | --              | --                                | \$38.94                           | \$0.61          | 15.6%                             | --                                   | --              | --                                |
| Take-away foods                                                                   | \$31.74                          | \$0.33          | 8.2%                              | --                                  | --              | --                                | \$34.06                          | \$0.37          | 9.2%                              | --                                  | --              | --                                | \$25.07                           | \$0.38          | 10.0%                             | --                                   | --              | --                                |
| Sugar sweetened soft drinks                                                       | \$4.44                           | \$0.05          | 1.1%                              | --                                  | --              | --                                | \$4.34                           | \$0.05          | 1.2%                              | --                                  | --              | --                                | \$1.30                            | <\$0.01         | 0.5%                              | --                                   | --              | --                                |
| <b>Total cost</b>                                                                 | <b>\$387.11</b>                  | <b>\$2.50</b>   | <b>100%</b>                       | <b>\$361.48</b>                     | <b>\$4.64</b>   | <b>100%</b>                       | <b>\$372.19</b>                  | <b>\$2.45</b>   | <b>100%</b>                       | <b>\$361.48</b>                     | <b>\$4.64</b>   | <b>100%</b>                       | <b>\$250.03</b>                   | <b>\$0.84</b>   | <b>100%</b>                       | <b>\$253.00</b>                      | <b>\$0.84</b>   | <b>100%</b>                       |
| Healthy foods and drinks                                                          | \$201.64                         | \$2.03          | 52.1%                             | \$361.48                            | \$4.64          | 100%                              | \$189.39                         | \$1.88          | 50.9%                             | \$361.48                            | \$4.64          | 100%                              | \$130.64                          | \$0.36          | 52.2%                             | \$253.00                             | \$0.84          | 100%                              |
| Discretionary foods and drinks                                                    | \$185.47                         | \$0.70          | 47.9%                             | --                                  | --              | --                                | \$182.80                         | \$0.75          | 49.1%                             | --                                  | --              | --                                | \$119.40                          | \$0.68          | 47.8%                             | --                                   | --              | --                                |

| Affordability of diets                                         |                                  |           |                                     |           |                                  |           |                                     |           |                                   |           |                                      |           |
|----------------------------------------------------------------|----------------------------------|-----------|-------------------------------------|-----------|----------------------------------|-----------|-------------------------------------|-----------|-----------------------------------|-----------|--------------------------------------|-----------|
| Income amount (A\$)                                            | Broader population household     |           |                                     |           | Welfare dependent household      |           |                                     |           |                                   |           |                                      |           |
|                                                                | Habitual Diet – branded products |           | Recommended Diet – branded products |           | Habitual Diet – branded products |           | Recommended Diet – branded products |           | Habitual Diet – cheapest products |           | Recommended Diet – cheapest products |           |
|                                                                | Affordability                    | Std error | Affordability                       | Std error | Affordability                    | Std error | Affordability                       | Std error | Affordability                     | Std error | Affordability                        | Std error |
| April 2023 Welfare only household income \$1,752 per fortnight | 22.10%                           | 0.14%     | 20.63%                              | 0.26%     | 21.24%                           | 0.14%     | 20.63%                              | 0.26%     | 14.27%                            | 0.05%     | 14.44%                               | 0.05%     |

Table S12: Diet cost and affordability by food group and food group components of habitual and recommended diets, for a single adult male household (Household E) in Greater Brisbane, April 2023

| Mean food group and food group component costs per fortnight for Greater Brisbane |                                  |                 |                                   |                                     |                 |                                   |                                  |                 |                                   |                                     |                 |                                   |                                   |                 |                                   |                                      |                 |                                   |
|-----------------------------------------------------------------------------------|----------------------------------|-----------------|-----------------------------------|-------------------------------------|-----------------|-----------------------------------|----------------------------------|-----------------|-----------------------------------|-------------------------------------|-----------------|-----------------------------------|-----------------------------------|-----------------|-----------------------------------|--------------------------------------|-----------------|-----------------------------------|
| Food group and food group component                                               | Broader population household     |                 |                                   |                                     |                 |                                   | Welfare dependent household      |                 |                                   |                                     |                 |                                   |                                   |                 |                                   |                                      |                 |                                   |
|                                                                                   | Habitual Diet – branded products |                 |                                   | Recommended Diet – branded products |                 |                                   | Habitual Diet – branded products |                 |                                   | Recommended Diet – branded products |                 |                                   | Habitual Diet – cheapest products |                 |                                   | Recommended Diet – cheapest products |                 |                                   |
|                                                                                   | Cost (A\$)                       | Std Error (A\$) | Proportion of total diet cost (%) | Cost (A\$)                          | Std Error (A\$) | Proportion of total diet cost (%) | Cost (A\$)                       | Std Error (A\$) | Proportion of total diet cost (%) | Cost (A\$)                          | Std Error (A\$) | Proportion of total diet cost (%) | Cost (A\$)                        | Std Error (A\$) | Proportion of total diet cost (%) | Cost (A\$)                           | Std Error (A\$) | Proportion of total diet cost (%) |
| Water                                                                             | \$8.10                           | \$0.20          | 2.6%                              | \$8.10                              | \$0.20          | 4.0%                              | \$4.85                           | \$0.12          | 0.9%                              | \$8.10                              | \$0.20          | 4.0%                              | \$1.68                            | <\$0.01         | 0.86%                             | \$2.81                               | <\$0.01         | 2.04%                             |
| Fruit                                                                             | \$17.33                          | \$0.30          | 5.6%                              | \$25.73                             | \$1.05          | 12.8%                             | \$15.10                          | \$0.32          | 6.2%                              | \$25.73                             | \$1.05          | 12.8%                             | \$12.09                           | \$0.10          | 6.15%                             | \$24.70                              | \$0.34          | 17.91%                            |
| Veg. & Legumes                                                                    | \$19.27                          | \$0.23          | 6.2%                              | \$35.76                             | \$0.46          | 17.7%                             | \$18.41                          | \$0.21          | 7.3%                              | \$35.76                             | \$0.46          | 17.7%                             | \$14.32                           | \$0.08          | 7.29%                             | \$26.27                              | \$0.12          | 19.05%                            |
| Grains & Cereals                                                                  | \$15.72                          | \$0.21          | 5.1%                              | \$34.30                             | \$0.55          | 17.0%                             | \$11.92                          | \$0.19          | 2.8%                              | \$34.30                             | \$0.55          | 17.0%                             | \$5.48                            | \$0.05          | 2.79%                             | \$14.47                              | \$0.04          | 10.49%                            |
| Meats, nuts, seeds, egg & alternatives                                            | \$44.56                          | \$0.48          | 14.4%                             | \$59.25                             | \$0.62          | 29.4%                             | \$38.86                          | \$0.44          | 16.3%                             | \$59.25                             | \$0.62          | 29.4%                             | \$31.96                           | \$0.15          | 16.27%                            | \$47.13                              | \$0.19          | 34.17%                            |
| Milk, yoghurt, cheese & alternatives                                              | \$19.02                          | \$0.18          | 6.1%                              | \$32.79                             | \$0.30          | 16.3%                             | \$18.64                          | \$0.17          | 6.5%                              | \$32.79                             | \$0.30          | 16.3%                             | \$12.72                           | \$0.08          | 6.48%                             | \$19.62                              | \$0.14          | 14.22%                            |
| Unsaturated oils & spreads                                                        | \$0.53                           | \$0.01          | 0.2%                              | \$5.66                              | \$0.08          | 2.8%                              | \$0.70                           | \$0.01          | 0.2%                              | \$5.66                              | \$0.08          | 2.8%                              | \$0.33                            | \$0.01          | 0.17%                             | \$2.92                               | \$0.02          | 2.12%                             |
| Artificially sweetened soft drink                                                 | \$2.80                           | \$0.03          | 0.9%                              | --                                  | --              | --                                | \$2.44                           | \$0.03          | 0.4%                              | --                                  | --              | --                                | \$0.73                            | <\$0.01         | 0.37%                             | --                                   | --              | --                                |
| Discretionary choices - other                                                     | \$56.29                          | \$0.48          | 18.2%                             | --                                  | --              | --                                | \$53.84                          | \$0.44          | 16.8%                             | --                                  | --              | --                                | \$33.06                           | \$0.11          | 16.83%                            | --                                   | --              | --                                |
| Alcoholic drinks                                                                  | \$65.86                          | \$0.31          | 21.3%                             | --                                  | --              | --                                | \$54.45                          | \$0.25          | 21.0%                             | --                                  | --              | --                                | \$41.24                           | \$1.33          | 21.00%                            | --                                   | --              | --                                |
| Take-away foods                                                                   | \$50.05                          | \$0.39          | 16.2%                             | --                                  | --              | --                                | \$53.18                          | \$0.38          | 20.6%                             | --                                  | --              | --                                | \$40.48                           | \$0.42          | 20.61%                            | --                                   | --              | --                                |
| Sugar sweetened soft drinks                                                       | \$9.83                           | \$0.11          | 3.2%                              | --                                  | --              | --                                | \$7.78                           | \$0.09          | 1.2%                              | --                                  | --              | --                                | \$2.33                            | <\$0.01         | 1.19%                             | --                                   | --              | --                                |
| <b>Total cost</b>                                                                 | <b>\$309.35</b>                  | <b>\$1.85</b>   | <b>100%</b>                       | <b>\$201.60</b>                     | <b>\$2.62</b>   | <b>100%</b>                       | <b>\$280.15</b>                  | <b>\$1.63</b>   | <b>100%</b>                       | <b>\$201.60</b>                     | <b>\$2.62</b>   | <b>100%</b>                       | <b>\$196.41</b>                   | <b>\$1.49</b>   | <b>100%</b>                       | <b>\$137.91</b>                      | <b>\$0.44</b>   | <b>100%</b>                       |
| Healthy foods and drinks                                                          | \$127.33                         | \$1.29          | 41.2%                             | \$201.60                            | \$2.62          | 100%                              | \$110.90                         | \$1.14          | 39.6%                             | \$201.60                            | \$2.62          | 100%                              | \$79.31                           | \$0.25          | 40.38%                            | \$137.91                             | \$0.44          | 100%                              |
| Discretionary foods and drinks                                                    | \$182.02                         | \$0.80          | 58.8%                             | --                                  | --              | --                                | \$169.24                         | \$0.69          | 60.4%                             | --                                  | --              | --                                | \$117.11                          | \$1.38          | 59.62%                            | --                                   | --              | --                                |

| Affordability of diets                                       |                                  |           |                                     |           |                                  |           |                                     |           |                                   |           |                                      |           |
|--------------------------------------------------------------|----------------------------------|-----------|-------------------------------------|-----------|----------------------------------|-----------|-------------------------------------|-----------|-----------------------------------|-----------|--------------------------------------|-----------|
| Income amount (A\$)                                          | Broader population household     |           |                                     |           | Welfare dependent household      |           |                                     |           |                                   |           |                                      |           |
|                                                              | Habitual Diet – branded products |           | Recommended Diet – branded products |           | Habitual Diet – branded products |           | Recommended Diet – branded products |           | Habitual Diet – cheapest products |           | Recommended Diet – cheapest products |           |
|                                                              | Affordability                    | Std error | Affordability                       | Std error | Affordability                    | Std error | Affordability                       | Std error | Affordability                     | Std error | Affordability                        | Std error |
| April 2023 Welfare only household income \$786 per fortnight | 39.38%                           | 0.23%     | 25.66%                              | 0.33%     | 35.66%                           | 0.21%     | 25.66%                              | 0.33%     | 25.00%                            | 0.19%     | 17.56%                               | 0.06%     |

Table S13: Diet cost and affordability by food group and food group components of habitual and recommended diets, for an older single female household (Household F) in Greater Brisbane, April 2023

| Mean food group and food group component costs per fortnight for Greater Brisbane |                                  |                 |                                   |                                     |                 |                                   |                                  |                 |                                   |                                     |                 |                                   |                                   |                 |                                   |                                      |                 |                                   |
|-----------------------------------------------------------------------------------|----------------------------------|-----------------|-----------------------------------|-------------------------------------|-----------------|-----------------------------------|----------------------------------|-----------------|-----------------------------------|-------------------------------------|-----------------|-----------------------------------|-----------------------------------|-----------------|-----------------------------------|--------------------------------------|-----------------|-----------------------------------|
| Food group and food group component                                               | Broader population household     |                 |                                   |                                     |                 |                                   | Welfare dependent household      |                 |                                   |                                     |                 |                                   |                                   |                 |                                   |                                      |                 |                                   |
|                                                                                   | Habitual Diet – branded products |                 |                                   | Recommended Diet – branded products |                 |                                   | Habitual Diet – branded products |                 |                                   | Recommended Diet – branded products |                 |                                   | Habitual Diet – cheapest products |                 |                                   | Recommended Diet – cheapest products |                 |                                   |
|                                                                                   | Cost (A\$)                       | Std Error (A\$) | Proportion of total diet cost (%) | Cost (A\$)                          | Std Error (A\$) | Proportion of total diet cost (%) | Cost (A\$)                       | Std Error (A\$) | Proportion of total diet cost (%) | Cost (A\$)                          | Std Error (A\$) | Proportion of total diet cost (%) | Cost (A\$)                        | Std Error (A\$) | Proportion of total diet cost (%) | Cost (A\$)                           | Std Error (A\$) | Proportion of total diet cost (%) |
| Water                                                                             | \$1.74                           | \$0.04          | 1.0%                              | \$1.74                              | \$0.04          | 1.0%                              | \$0.64                           | \$0.02          | 0.4%                              | \$1.74                              | \$0.04          | 1.0%                              | \$0.22                            | <\$0.01         | 0.2%                              | \$0.60                               | <\$0.01         | 0.5%                              |
| Fruit                                                                             | \$19.59                          | \$0.32          | 11.5%                             | \$25.73                             | \$1.05          | 15.1%                             | \$18.51                          | \$0.29          | 11.2%                             | \$25.73                             | \$1.05          | 15.1%                             | \$13.87                           | \$0.09          | 12.5%                             | \$24.70                              | \$0.34          | 21.0%                             |
| Veg. & Legumes                                                                    | \$14.68                          | \$0.20          | 8.6%                              | \$29.13                             | \$0.43          | 17.1%                             | \$14.39                          | \$0.19          | 8.7%                              | \$29.13                             | \$0.43          | 17.1%                             | \$11.22                           | \$0.06          | 10.1%                             | \$22.52                              | \$0.12          | 19.1%                             |
| Grains & Cereals                                                                  | \$12.65                          | \$0.23          | 7.4%                              | \$17.37                             | \$0.28          | 10.2%                             | \$13.29                          | \$0.25          | 8.0%                              | \$17.37                             | \$0.28          | 10.2%                             | \$5.53                            | \$0.03          | 5.0%                              | \$7.80                               | \$0.02          | 6.6%                              |
| Meats, nuts, seeds, egg & alternatives                                            | \$33.22                          | \$0.39          | 19.5%                             | \$39.49                             | \$0.44          | 23.2%                             | \$30.93                          | \$0.36          | 18.6%                             | \$39.49                             | \$0.44          | 23.2%                             | \$24.08                           | \$0.12          | 21.6%                             | \$28.37                              | \$0.12          | 24.1%                             |
| Milk, yoghurt, cheese & alternatives                                              | \$13.15                          | \$0.11          | 7.7%                              | \$54.18                             | \$0.49          | 31.8%                             | \$12.05                          | \$0.10          | 7.3%                              | \$54.18                             | \$0.49          | 31.8%                             | \$7.73                            | \$0.04          | 6.9%                              | \$32.42                              | \$0.23          | 27.5%                             |
| Unsaturated oils & spreads                                                        | \$0.68                           | \$0.01          | 0.4%                              | \$2.84                              | \$0.04          | 1.7%                              | \$0.69                           | \$0.01          | 0.4%                              | \$2.84                              | \$0.04          | 1.7%                              | \$0.31                            | \$0.01          | 0.3%                              | \$1.47                               | \$0.01          | 1.2%                              |
| Artificially sweetened soft drink                                                 | \$0.36                           | <\$0.00         | 0.2%                              | --                                  | --              | --                                | \$0.22                           | \$0.00          | 0.1%                              | --                                  | --              | --                                | \$0.07                            | <\$0.01         | 0.1%                              | --                                   | --              | --                                |
| Discretionary choices - other                                                     | \$39.22                          | \$0.25          | 23.1%                             | --                                  | --              | --                                | \$38.51                          | \$0.25          | 23.2%                             | --                                  | --              | --                                | \$23.51                           | \$0.08          | 21.1%                             | --                                   | --              | --                                |
| Alcoholic drinks                                                                  | \$20.86                          | \$0.14          | 12.3%                             | --                                  | --              | --                                | \$22.21                          | \$0.13          | 13.4%                             | --                                  | --              | --                                | \$14.73                           | \$0.10          | 13.2%                             | --                                   | --              | --                                |
| Take-away foods                                                                   | \$12.21                          | \$0.11          | 7.2%                              | --                                  | --              | --                                | \$13.02                          | \$0.14          | 7.9%                              | --                                  | --              | --                                | \$9.63                            | \$0.14          | 8.6%                              | --                                   | --              | --                                |
| Sugar sweetened soft drinks                                                       | \$1.78                           | \$0.02          | 1.0%                              | --                                  | --              | --                                | \$1.41                           | \$0.02          | 0.9%                              | --                                  | --              | --                                | \$0.42                            | <\$0.01         | 0.4%                              | --                                   | --              | --                                |
| <b>Total cost</b>                                                                 | <b>\$170.15</b>                  | <b>\$1.20</b>   | <b>100%</b>                       | <b>\$170.48</b>                     | <b>\$2.23</b>   | <b>100%</b>                       | <b>\$165.86</b>                  | <b>\$1.17</b>   | <b>100%</b>                       | <b>\$170.48</b>                     | <b>\$2.23</b>   | <b>100%</b>                       | <b>\$111.32</b>                   | <b>\$0.24</b>   | <b>100%</b>                       | <b>\$117.88</b>                      | <b>\$0.41</b>   | <b>100%</b>                       |
| Healthy foods and drinks                                                          | \$96.07                          | \$1.00          | 56.5%                             | \$170.48                            | \$2.23          | 100%                              | \$90.71                          | \$0.92          | 54.7%                             | \$170.48                            | \$2.23          | 100%                              | \$63.02                           | \$0.18          | 56.6%                             | \$117.88                             | \$0.41          | 100%                              |
| Discretionary foods and drinks                                                    | \$74.07                          | \$0.30          | 43.5%                             | --                                  | --              | --                                | \$75.15                          | \$0.32          | 45.3%                             | --                                  | --              | --                                | \$48.30                           | \$0.16          | 43.4%                             | --                                   | --              | --                                |

| Affordability of diets                                         |                                  |           |                                     |           |                                  |           |                                     |           |                                   |           |                                      |           |
|----------------------------------------------------------------|----------------------------------|-----------|-------------------------------------|-----------|----------------------------------|-----------|-------------------------------------|-----------|-----------------------------------|-----------|--------------------------------------|-----------|
| Income amount<br>(A\$)                                         | Broader population household     |           |                                     |           | Welfare dependent household      |           |                                     |           |                                   |           |                                      |           |
|                                                                | Habitual Diet – branded products |           | Recommended Diet – branded products |           | Habitual Diet – branded products |           | Recommended Diet – branded products |           | Habitual Diet – cheapest products |           | Recommended Diet – cheapest products |           |
|                                                                | Affordability                    | Std error | Affordability                       | Std error | Affordability                    | Std error | Affordability                       | Std error | Affordability                     | Std error | Affordability                        | Std error |
| April 2023 Welfare only household income \$1,221 per fortnight | 13.93%                           | 0.10%     | 13.96%                              | 0.18%     | 13.58%                           | 0.10%     | 13.96%                              | 0.18%     | 9.12%                             | 0.02%     | 9.65%                                | 0.03%     |

Table S14: Diet cost and affordability by food group and food group components of habitual and recommended diets, for a two adult, senior female, three children household (Household A) in Greater Brisbane, September 2023

| Mean food group and food group component costs per fortnight for Greater Brisbane |                                  |                 |                                   |                                     |                 |                                   |                                  |                 |                                   |                                     |                 |                                   |                                   |                 |                                   |                                      |                 |                                   |
|-----------------------------------------------------------------------------------|----------------------------------|-----------------|-----------------------------------|-------------------------------------|-----------------|-----------------------------------|----------------------------------|-----------------|-----------------------------------|-------------------------------------|-----------------|-----------------------------------|-----------------------------------|-----------------|-----------------------------------|--------------------------------------|-----------------|-----------------------------------|
| Food group and food group component                                               | Broader population household     |                 |                                   |                                     |                 |                                   | Welfare dependent household      |                 |                                   |                                     |                 |                                   |                                   |                 |                                   |                                      |                 |                                   |
|                                                                                   | Habitual Diet – branded products |                 |                                   | Recommended Diet – branded products |                 |                                   | Habitual Diet – branded products |                 |                                   | Recommended Diet – branded products |                 |                                   | Habitual Diet – cheapest products |                 |                                   | Recommended Diet – cheapest products |                 |                                   |
|                                                                                   | Cost (A\$)                       | Std Error (A\$) | Proportion of total diet cost (%) | Cost (A\$)                          | Std Error (A\$) | Proportion of total diet cost (%) | Cost (A\$)                       | Std Error (A\$) | Proportion of total diet cost (%) | Cost (A\$)                          | Std Error (A\$) | Proportion of total diet cost (%) | Cost (A\$)                        | Std Error (A\$) | Proportion of total diet cost (%) | Cost (A\$)                           | Std Error (A\$) | Proportion of total diet cost (%) |
| Water                                                                             | \$24.57                          | \$0.61          | 1.9%                              | \$24.57                             | \$0.61          | 2.3%                              | \$16.29                          | \$0.40          | 1.3%                              | \$24.57                             | \$0.61          | 2.3%                              | \$5.65                            | <\$0.01         | 0.7%                              | \$8.52                               | <\$0.01         | 1.1%                              |
| Fruit                                                                             | \$113.12                         | \$2.01          | 9.0%                              | \$143.34                            | \$5.83          | 13.3%                             | \$96.16                          | \$1.61          | 7.7%                              | \$143.34                            | \$5.83          | 13.3%                             | \$73.33                           | \$0.40          | 9.1%                              | \$137.59                             | \$1.88          | 18.5%                             |
| Veg. & Legumes                                                                    | \$76.44                          | \$0.95          | 6.1%                              | \$188.11                            | \$2.70          | 17.4%                             | \$71.04                          | \$0.78          | 5.7%                              | \$188.11                            | \$2.70          | 17.4%                             | \$57.32                           | \$0.30          | 7.1%                              | \$144.23                             | \$0.73          | 19.4%                             |
| Grains & Cereals                                                                  | \$82.50                          | \$1.26          | 6.5%                              | \$177.29                            | \$2.89          | 16.4%                             | \$74.77                          | \$1.20          | 6.0%                              | \$177.29                            | \$2.89          | 16.4%                             | \$36.95                           | \$0.22          | 4.6%                              | \$74.58                              | \$0.22          | 10.0%                             |
| Meats, nuts, seeds, egg & alternatives                                            | \$165.84                         | \$1.90          | 13.1%                             | \$305.34                            | \$3.25          | 28.3%                             | \$147.67                         | \$1.67          | 11.9%                             | \$305.34                            | \$3.25          | 28.3%                             | \$117.04                          | \$0.55          | 14.5%                             | \$236.93                             | \$1.03          | 31.9%                             |
| Milk, yoghurt, cheese & alternatives                                              | \$103.05                         | \$0.90          | 8.2%                              | \$223.27                            | \$2.06          | 20.7%                             | \$94.37                          | \$0.79          | 7.6%                              | \$223.27                            | \$2.06          | 20.7%                             | \$62.30                           | \$0.33          | 7.7%                              | \$132.79                             | \$0.95          | 17.9%                             |
| Unsaturated oils & spreads                                                        | \$3.04                           | \$0.05          | 0.2%                              | \$16.50                             | \$0.22          | 1.5%                              | \$3.91                           | \$0.06          | 0.3%                              | \$16.50                             | \$0.22          | 1.5%                              | \$1.81                            | \$0.04          | 0.2%                              | \$8.52                               | \$0.06          | 1.1%                              |
| Artificially sweetened soft drink                                                 | \$7.91                           | \$0.09          | 0.6%                              | --                                  | --              | --                                | \$4.41                           | \$0.05          | 0.4%                              | --                                  | --              | --                                | \$1.33                            | <\$0.01         | 0.2%                              | --                                   | --              | --                                |
| Discretionary choices - other                                                     | \$314.39                         | \$2.44          | 24.9%                             | --                                  | --              | --                                | \$296.70                         | \$2.21          | 23.9%                             | --                                  | --              | --                                | \$167.87                          | \$0.36          | 20.7%                             | --                                   | --              | --                                |
| Alcoholic drinks                                                                  | \$114.81                         | \$0.63          | 9.1%                              | --                                  | --              | --                                | \$115.18                         | \$0.66          | 9.3%                              | --                                  | --              | --                                | \$85.72                           | \$1.54          | 10.6%                             | --                                   | --              | --                                |
| Take-away foods                                                                   | \$217.35                         | \$1.64          | 17.2%                             | --                                  | --              | --                                | \$265.96                         | \$1.79          | 21.4%                             | --                                  | --              | --                                | \$184.22                          | \$2.13          | 22.7%                             | --                                   | --              | --                                |
| Sugar sweetened soft drinks                                                       | \$40.29                          | \$0.46          | 3.2%                              | --                                  | --              | --                                | \$54.73                          | \$0.63          | 4.4%                              | --                                  | --              | --                                | \$16.41                           | <\$0.01         | 2.0%                              | --                                   | --              | --                                |
| <b>Total cost</b>                                                                 | <b>\$1,263.31</b>                | <b>\$8.65</b>   | <b>100%</b>                       | <b>\$1,078.42</b>                   | <b>\$14.07</b>  | <b>100%</b>                       | <b>\$1,241.20</b>                | <b>\$7.89</b>   | <b>100%</b>                       | <b>\$1,078.42</b>                   | <b>\$14.07</b>  | <b>100%</b>                       | <b>\$809.93</b>                   | <b>\$2.66</b>   | <b>100%</b>                       | <b>\$743.17</b>                      | <b>\$2.43</b>   | <b>100%</b>                       |
| Healthy foods and drinks                                                          | \$576.47                         | \$6.17          | 45.6%                             | \$1,078.42                          | \$14.07         | 100%                              | \$508.62                         | \$5.12          | 41.0%                             | \$1,078.42                          | \$14.07         | 100%                              | \$355.72                          | \$0.87          | 43.9%                             | \$743.17                             | \$2.43          | 100%                              |
| Discretionary foods and drinks                                                    | \$686.83                         | \$3.40          | 54.4%                             | --                                  | --              | --                                | \$732.58                         | \$3.54          | 59.0%                             | --                                  | --              | --                                | \$454.21                          | \$2.49          | 56.1%                             | --                                   | --              | --                                |

| Affordability of diets                                                |                                  |           |                                     |           |                                  |           |                                     |           |                                   |           |                                      |           |  |
|-----------------------------------------------------------------------|----------------------------------|-----------|-------------------------------------|-----------|----------------------------------|-----------|-------------------------------------|-----------|-----------------------------------|-----------|--------------------------------------|-----------|--|
| Income amount (A\$)                                                   | Broader population household     |           |                                     |           | Welfare dependent household      |           |                                     |           |                                   |           |                                      |           |  |
|                                                                       | Habitual Diet – branded products |           | Recommended Diet – branded products |           | Habitual Diet – branded products |           | Recommended Diet – branded products |           | Habitual Diet – cheapest products |           | Recommended Diet – cheapest products |           |  |
|                                                                       | Affordability                    | Std error | Affordability                       | Std error | Affordability                    | Std error | Affordability                       | Std error | Affordability                     | Std error | Affordability                        | Std error |  |
| September 2023<br>Welfare only household income \$3,400 per fortnight | 37.16%                           | 0.25%     | 31.72%                              | 0.41%     | 36.51%                           | 0.23%     | 31.72%                              | 0.41%     | 23.82%                            | 0.08%     | 21.86%                               | 0.07%     |  |



Table S15: Diet cost and affordability by food group and food group components of habitual and recommended diets, for a two adult, two children household (Household B) in Greater Brisbane, September 2023

| Mean food group and food group component costs per fortnight for Greater Brisbane |                                  |                 |                                   |                                     |                 |                                   |                                  |                 |                                   |                                     |                 |                                   |                                   |                 |                                   |                                      |                 |                                   |
|-----------------------------------------------------------------------------------|----------------------------------|-----------------|-----------------------------------|-------------------------------------|-----------------|-----------------------------------|----------------------------------|-----------------|-----------------------------------|-------------------------------------|-----------------|-----------------------------------|-----------------------------------|-----------------|-----------------------------------|--------------------------------------|-----------------|-----------------------------------|
| Food group and food group component                                               | Broader population household     |                 |                                   |                                     |                 |                                   | Welfare dependent household      |                 |                                   |                                     |                 |                                   |                                   |                 |                                   |                                      |                 |                                   |
|                                                                                   | Habitual Diet – branded products |                 |                                   | Recommended Diet – branded products |                 |                                   | Habitual Diet – branded products |                 |                                   | Recommended Diet – branded products |                 |                                   | Habitual Diet – cheapest products |                 |                                   | Recommended Diet – cheapest products |                 |                                   |
|                                                                                   | Cost (A\$)                       | Std Error (A\$) | Proportion of total diet cost (%) | Cost (A\$)                          | Std Error (A\$) | Proportion of total diet cost (%) | Cost (A\$)                       | Std Error (A\$) | Proportion of total diet cost (%) | Cost (A\$)                          | Std Error (A\$) | Proportion of total diet cost (%) | Cost (A\$)                        | Std Error (A\$) | Proportion of total diet cost (%) | Cost (A\$)                           | Std Error (A\$) | Proportion of total diet cost (%) |
| Water                                                                             | \$21.88                          | \$0.54          | 2.4%                              | \$21.88                             | \$0.54          | 2.8%                              | \$14.40                          | \$0.35          | 1.6%                              | \$21.88                             | \$0.54          | 2.8%                              | \$4.99                            | <\$0.01         | 0.8%                              | \$7.58                               | <\$0.01         | 1.4%                              |
| Fruit                                                                             | \$69.47                          | \$1.31          | 7.5%                              | \$98.94                             | \$4.03          | 12.9%                             | \$58.09                          | \$1.01          | 6.3%                              | \$98.94                             | \$4.03          | 12.9%                             | \$44.58                           | \$0.26          | 7.5%                              | \$94.98                              | \$1.30          | 18.0%                             |
| Veg. & Legumes                                                                    | \$53.20                          | \$0.64          | 5.7%                              | \$131.50                            | \$1.85          | 17.1%                             | \$48.96                          | \$0.52          | 5.4%                              | \$131.50                            | \$1.85          | 17.1%                             | \$39.80                           | \$0.20          | 6.7%                              | \$100.57                             | \$0.51          | 19.1%                             |
| Grains & Cereals                                                                  | \$56.31                          | \$0.83          | 6.1%                              | \$136.46                            | \$2.22          | 17.8%                             | \$47.96                          | \$0.74          | 5.2%                              | \$136.46                            | \$2.22          | 17.8%                             | \$24.59                           | \$0.16          | 4.1%                              | \$57.07                              | \$0.17          | 10.8%                             |
| Meats, nuts, seeds, egg & alternatives                                            | \$118.21                         | \$1.38          | 12.7%                             | \$224.15                            | \$2.36          | 29.2%                             | \$104.75                         | \$1.20          | 11.4%                             | \$224.15                            | \$2.36          | 29.2%                             | \$83.56                           | \$0.40          | 14.0%                             | \$176.37                             | \$0.76          | 33.4%                             |
| Milk, yoghurt, cheese & alternatives                                              | \$66.90                          | \$0.58          | 7.2%                              | \$142.18                            | \$1.31          | 18.5%                             | \$67.05                          | \$0.57          | 7.3%                              | \$142.18                            | \$1.31          | 18.5%                             | \$44.64                           | \$0.25          | 7.5%                              | \$84.63                              | \$0.60          | 16.0%                             |
| Unsaturated oils & spreads                                                        | \$1.98                           | \$0.03          | 0.2%                              | \$12.63                             | \$0.17          | 1.6%                              | \$2.49                           | \$0.04          | 0.3%                              | \$12.63                             | \$0.17          | 1.6%                              | \$1.15                            | \$0.03          | 0.2%                              | \$6.52                               | \$0.05          | 1.24                              |
| Artificially sweetened soft drink                                                 | \$7.11                           | \$0.08          | 0.8%                              | --                                  | --              | --                                | \$4.18                           | \$0.05          | 0.5%                              | --                                  | --              | --                                | \$1.26                            | <\$0.01         | 0.2%                              | --                                   | --              | --                                |
| Discretionary choices - other                                                     | \$221.61                         | \$1.87          | 23.8%                             | --                                  | --              | --                                | \$209.79                         | \$1.69          | 22.9%                             | --                                  | --              | --                                | \$117.67                          | \$0.24          | 19.7%                             | --                                   | --              | --                                |
| Alcoholic drinks                                                                  | \$93.92                          | \$0.49          | 10.1%                             | --                                  | --              | --                                | \$92.90                          | \$0.54          | 10.2%                             | --                                  | --              | --                                | \$70.95                           | \$1.46          | 11.9%                             | --                                   | --              | --                                |
| Take-away foods                                                                   | \$183.07                         | \$1.36          | 19.7%                             | --                                  | --              | --                                | \$215.89                         | \$1.43          | 23.6%                             | --                                  | --              | --                                | \$150.59                          | \$1.70          | 25.2%                             | --                                   | --              | --                                |
| Sugar sweetened soft drinks                                                       | \$35.80                          | \$0.41          | 3.9%                              | --                                  | --              | --                                | \$48.55                          | \$0.56          | 5.3%                              | --                                  | --              | --                                | \$14.55                           | <\$0.01         | 2.4%                              | --                                   | --              | --                                |
| <b>Total cost</b>                                                                 | <b>\$929.46</b>                  | <b>\$6.22</b>   | <b>100%</b>                       | <b>\$767.76</b>                     | <b>\$10.00</b>  | <b>100%</b>                       | <b>\$915.01</b>                  | <b>\$5.65</b>   | <b>100%</b>                       | <b>\$767.76</b>                     | <b>\$10.00</b>  | <b>100%</b>                       | <b>\$598.32</b>                   | <b>\$2.21</b>   | <b>100%</b>                       | <b>\$527.72</b>                      | <b>\$1.70</b>   | <b>100%</b>                       |
| Healthy foods and drinks                                                          | \$395.06                         | \$4.27          | 42.5%                             | \$767.76                            | \$10.00         | 100%                              | \$347.88                         | \$3.47          | 38.0%                             | \$767.76                            | \$10.00         | 100%                              | \$244.56                          | \$0.61          | 40.9%                             | \$527.72                             | \$1.70          | 100%                              |
| Discretionary foods and drinks                                                    | \$534.41                         | \$2.70          | 57.5%                             | --                                  | --              | --                                | \$567.14                         | \$2.79          | 62.0%                             | --                                  | --              | --                                | \$353.76                          | \$2.12          | 59.1%                             | --                                   | --              | --                                |

| Affordability of diets                                             |                                  |           |                                     |           |                                  |           |                                     |           |                                   |           |                                      |           |
|--------------------------------------------------------------------|----------------------------------|-----------|-------------------------------------|-----------|----------------------------------|-----------|-------------------------------------|-----------|-----------------------------------|-----------|--------------------------------------|-----------|
| Income amount (A\$)                                                | Broader population household     |           |                                     |           | Welfare dependent household      |           |                                     |           |                                   |           |                                      |           |
|                                                                    | Habitual Diet – branded products |           | Recommended Diet – branded products |           | Habitual Diet – branded products |           | Recommended Diet – branded products |           | Habitual Diet – cheapest products |           | Recommended Diet – cheapest products |           |
|                                                                    | Affordability                    | Std error | Affordability                       | Std error | Affordability                    | Std error | Affordability                       | Std error | Affordability                     | Std error | Affordability                        | Std error |
| September 2023 Welfare only household income \$2,218 per fortnight | 41.90%                           | 0.28%     | 34.61%                              | 0.45%     | 41.25%                           | 0.25%     | 34.61%                              | 0.45%     | 26.97%                            | 0.10%     | 23.79%                               | 0.08%     |

Table S16: Diet cost and affordability by food group and food group components of habitual and recommended diets, for an adult female, two children household (Household C) in Greater Brisbane, September 2023

| Mean food group and food group component costs per fortnight for Greater Brisbane |                                  |                 |                                   |                                     |                 |                                   |                                  |                 |                                   |                                     |                 |                                   |                                   |                 |                                   |                                      |                 |                                   |
|-----------------------------------------------------------------------------------|----------------------------------|-----------------|-----------------------------------|-------------------------------------|-----------------|-----------------------------------|----------------------------------|-----------------|-----------------------------------|-------------------------------------|-----------------|-----------------------------------|-----------------------------------|-----------------|-----------------------------------|--------------------------------------|-----------------|-----------------------------------|
| Food group and food group component                                               | Broader population household     |                 |                                   |                                     |                 |                                   | Welfare dependent household      |                 |                                   |                                     |                 |                                   |                                   |                 |                                   |                                      |                 |                                   |
|                                                                                   | Habitual Diet – branded products |                 |                                   | Recommended Diet – branded products |                 |                                   | Habitual Diet – branded products |                 |                                   | Recommended Diet – branded products |                 |                                   | Habitual Diet – cheapest products |                 |                                   | Recommended Diet – cheapest products |                 |                                   |
|                                                                                   | Cost (A\$)                       | Std Error (A\$) | Proportion of total diet cost (%) | Cost (A\$)                          | Std Error (A\$) | Proportion of total diet cost (%) | Cost (A\$)                       | Std Error (A\$) | Proportion of total diet cost (%) | Cost (A\$)                          | Std Error (A\$) | Proportion of total diet cost (%) | Cost (A\$)                        | Std Error (A\$) | Proportion of total diet cost (%) | Cost (A\$)                           | Std Error (A\$) | Proportion of total diet cost (%) |
| Water                                                                             | \$13.53                          | \$0.33          | 2.2%                              | \$13.53                             | \$0.33          | 2.4%                              | \$9.39                           | \$0.23          | 1.5%                              | \$13.53                             | \$0.33          | 2.4%                              | \$3.25                            | <\$0.01         | 0.8%                              | \$4.69                               | <\$0.01         | 1.2%                              |
| Fruit                                                                             | \$52.27                          | \$1.01          | 8.5%                              | \$73.57                             | \$2.99          | 13.1%                             | \$43.12                          | \$0.69          | 6.8%                              | \$73.57                             | \$2.99          | 13.1%                             | \$32.62                           | \$0.17          | 8.2%                              | \$70.62                              | \$0.96          | 18.2%                             |
| Veg. & Legumes                                                                    | \$33.36                          | \$0.41          | 5.4%                              | \$94.38                             | \$1.38          | 16.8%                             | \$29.99                          | \$0.31          | 4.8%                              | \$94.38                             | \$1.38          | 16.8%                             | \$25.05                           | \$0.12          | 6.3%                              | \$73.31                              | \$0.38          | 18.9%                             |
| Grains & Cereals                                                                  | \$40.16                          | \$0.61          | 6.5%                              | \$101.43                            | \$1.66          | 18.0%                             | \$35.68                          | \$0.54          | 5.7%                              | \$101.43                            | \$1.66          | 18.0%                             | \$18.93                           | \$0.10          | 4.7%                              | \$42.25                              | \$0.13          | 10.9%                             |
| Meats, nuts, seeds, egg & alternatives                                            | \$73.64                          | \$0.91          | 11.9%                             | \$164.68                            | \$1.75          | 29.2%                             | \$65.92                          | \$0.78          | 10.4%                             | \$164.68                            | \$1.75          | 29.2%                             | \$51.67                           | \$0.25          | 12.9%                             | \$129.15                             | \$0.57          | 33.3%                             |
| Milk, yoghurt, cheese & alternatives                                              | \$47.55                          | \$0.40          | 7.7%                              | \$108.64                            | \$1.00          | 19.3%                             | \$48.13                          | \$0.40          | 7.6%                              | \$108.64                            | \$1.00          | 19.3%                             | \$31.73                           | \$0.18          | 7.9%                              | \$64.62                              | \$0.46          | 16.6%                             |
| Unsaturated oils & spreads                                                        | \$1.44                           | \$0.02          | 0.2%                              | \$6.94                              | \$0.09          | 1.2%                              | \$1.76                           | \$0.03          | 0.3%                              | \$6.94                              | \$0.09          | 1.2%                              | \$0.80                            | \$0.02          | 0.2%                              | \$3.58                               | \$0.03          | 0.9%                              |
| Artificially sweetened soft drink                                                 | \$4.22                           | \$0.05          | 0.7%                              | --                                  | --              | --                                | \$1.67                           | \$0.02          | 0.3%                              | --                                  | --              | --                                | \$0.50                            | <\$0.01         | 0.1%                              | --                                   | --              | --                                |
| Discretionary choices - other                                                     | \$165.09                         | \$1.40          | 26.8%                             | --                                  | --              | --                                | \$155.53                         | \$1.26          | 24.6%                             | --                                  | --              | --                                | \$84.32                           | \$0.16          | 21.1%                             | --                                   | --              | --                                |
| Alcoholic drinks                                                                  | \$27.83                          | \$0.19          | 4.5%                              | --                                  | --              | --                                | \$38.17                          | \$0.42          | 6.0%                              | --                                  | --              | --                                | \$29.47                           | \$0.19          | 7.4%                              | --                                   | --              | --                                |
| Take-away foods                                                                   | \$131.91                         | \$0.97          | 21.4%                             | --                                  | --              | --                                | \$161.52                         | \$1.04          | 25.6%                             | --                                  | --              | --                                | \$109.21                          | \$1.27          | 27.3%                             | --                                   | --              | --                                |
| Sugar sweetened soft drinks                                                       | \$25.67                          | \$0.30          | 4.2%                              | --                                  | --              | --                                | \$40.53                          | \$0.47          | 6.4%                              | --                                  | --              | --                                | \$12.15                           | <\$0.01         | 3.0%                              | --                                   | --              | --                                |
| <b>Total cost</b>                                                                 | <b>\$616.67</b>                  | <b>\$4.37</b>   | <b>100%</b>                       | <b>\$563.17</b>                     | <b>\$7.35</b>   | <b>100%</b>                       | <b>\$631.41</b>                  | <b>\$4.02</b>   | <b>100%</b>                       | <b>\$563.17</b>                     | <b>\$7.35</b>   | <b>100%</b>                       | <b>\$399.71</b>                   | <b>\$1.26</b>   | <b>100%</b>                       | <b>\$388.23</b>                      | <b>\$1.26</b>   | <b>100%</b>                       |
| Healthy foods and drinks                                                          | \$266.16                         | \$2.97          | 43.2%                             | \$563.17                            | \$7.35          | 100%                              | \$235.66                         | \$2.32          | 37.3%                             | \$563.17                            | \$7.35          | 100%                              | \$164.56                          | \$0.37          | 41.2%                             | \$388.23                             | \$1.26          | 100%                              |
| Discretionary foods and drinks                                                    | \$350.50                         | \$1.93          | 56.8%                             | --                                  | --              | --                                | \$395.75                         | \$2.12          | 62.7%                             | --                                  | --              | --                                | \$235.15                          | \$1.33          | 58.8%                             | --                                   | --              | --                                |

| Affordability of diets                                             |                                  |           |                                     |           |                                  |           |                                     |           |                                   |           |                                      |           |
|--------------------------------------------------------------------|----------------------------------|-----------|-------------------------------------|-----------|----------------------------------|-----------|-------------------------------------|-----------|-----------------------------------|-----------|--------------------------------------|-----------|
| Income amount (A\$)                                                | Broader population household     |           |                                     |           | Welfare dependent household      |           |                                     |           |                                   |           |                                      |           |
|                                                                    | Habitual Diet – branded products |           | Recommended Diet – branded products |           | Habitual Diet – branded products |           | Recommended Diet – branded products |           | Habitual Diet – cheapest products |           | Recommended Diet – cheapest products |           |
|                                                                    | Affordability                    | Std error | Affordability                       | Std error | Affordability                    | Std error | Affordability                       | Std error | Affordability                     | Std error | Affordability                        | Std error |
| September 2023 Welfare only household income \$1,901 per fortnight | 32.44%                           | 0.23%     | 29.62%                              | 0.39%     | 33.21%                           | 0.21%     | 29.62%                              | 0.39%     | 21.03%                            | 0.07%     | 20.42%                               | 0.07%     |

Table S17: Diet cost and affordability by food group and food group components of habitual and recommended diets, for an older retired couple household (Household D) in Greater Brisbane, September 2023

| Mean food group and food group component costs per fortnight for Greater Brisbane |                                  |                 |                                   |                                     |                 |                                   |                                  |                 |                                   |                                     |                 |                                   |                                   |                 |                                   |                                      |                 |                                   |
|-----------------------------------------------------------------------------------|----------------------------------|-----------------|-----------------------------------|-------------------------------------|-----------------|-----------------------------------|----------------------------------|-----------------|-----------------------------------|-------------------------------------|-----------------|-----------------------------------|-----------------------------------|-----------------|-----------------------------------|--------------------------------------|-----------------|-----------------------------------|
| Food group and food group component                                               | Broader population household     |                 |                                   |                                     |                 |                                   | Welfare dependent household      |                 |                                   |                                     |                 |                                   |                                   |                 |                                   |                                      |                 |                                   |
|                                                                                   | Habitual Diet – branded products |                 |                                   | Recommended Diet – branded products |                 |                                   | Habitual Diet – branded products |                 |                                   | Recommended Diet – branded products |                 |                                   | Habitual Diet – cheapest products |                 |                                   | Recommended Diet – cheapest products |                 |                                   |
|                                                                                   | Cost (A\$)                       | Std Error (A\$) | Proportion of total diet cost (%) | Cost (A\$)                          | Std Error (A\$) | Proportion of total diet cost (%) | Cost (A\$)                       | Std Error (A\$) | Proportion of total diet cost (%) | Cost (A\$)                          | Std Error (A\$) | Proportion of total diet cost (%) | Cost (A\$)                        | Std Error (A\$) | Proportion of total diet cost (%) | Cost (A\$)                           | Std Error (A\$) | Proportion of total diet cost (%) |
| Water                                                                             | \$3.81                           | \$0.09          | 1.0%                              | \$3.81                              | \$0.09          | 1.0%                              | \$1.95                           | \$0.05          | 0.5%                              | \$3.81                              | \$0.09          | 1.0%                              | \$0.67                            | <\$0.01         | 0.3%                              | \$1.32                               | <\$0.01         | 0.5%                              |
| Fruit                                                                             | \$41.19                          | \$0.66          | 10.5%                             | \$50.74                             | \$2.07          | 13.8%                             | \$38.15                          | \$0.56          | 10.1%                             | \$50.74                             | \$2.07          | 13.8%                             | \$28.41                           | \$0.17          | 11.3%                             | \$48.71                              | \$0.67          | 19.0%                             |
| Veg. & Legumes                                                                    | \$32.62                          | \$0.39          | 8.3%                              | \$61.92                             | \$0.90          | 16.9%                             | \$31.52                          | \$0.39          | 8.4%                              | \$61.92                             | \$0.90          | 16.9%                             | \$24.81                           | \$0.16          | 9.8%                              | \$47.79                              | \$0.25          | 18.7%                             |
| Grains & Cereals                                                                  | \$29.17                          | \$0.50          | 7.5%                              | \$43.88                             | \$0.70          | 12.0%                             | \$31.24                          | \$0.58          | 8.3%                              | \$43.88                             | \$0.70          | 12.0%                             | \$13.48                           | \$0.07          | 5.3%                              | \$19.39                              | \$0.05          | 7.6%                              |
| Meats, nuts, seeds, egg & alternatives                                            | \$66.54                          | \$0.77          | 17.0%                             | \$97.91                             | \$1.04          | 26.7%                             | \$60.21                          | \$0.68          | 16.0%                             | \$97.91                             | \$1.04          | 26.7%                             | \$46.69                           | \$0.21          | 18.5%                             | \$74.48                              | \$0.32          | 29.1%                             |
| Milk, yoghurt, cheese & alternatives                                              | \$27.22                          | \$0.23          | 7.0%                              | \$102.89                            | \$0.95          | 28.0%                             | \$25.66                          | \$0.21          | 6.8%                              | \$102.89                            | \$0.95          | 28.0%                             | \$16.64                           | \$0.08          | 6.6%                              | \$61.35                              | \$0.43          | 24.0%                             |
| Unsaturated oils & spreads                                                        | \$1.55                           | \$0.03          | 0.4%                              | \$5.72                              | \$0.08          | 1.6%                              | \$1.55                           | \$0.03          | 0.4%                              | \$5.72                              | \$0.08          | 1.6%                              | \$0.70                            | \$0.02          | 0.3%                              | \$2.96                               | \$0.02          | 1.2%                              |
| Artificially sweetened soft drink                                                 | \$1.55                           | \$0.02          | 0.4%                              | --                                  | --              | --                                | \$1.14                           | \$0.01          | 0.3%                              | --                                  | --              | --                                | \$0.34                            | <\$0.01         | 0.1%                              | --                                   | --              | --                                |
| Discretionary choices - other                                                     | \$86.66                          | \$0.54          | 22.2%                             | --                                  | --              | --                                | \$87.25                          | \$0.55          | 23.2%                             | --                                  | --              | --                                | \$54.66                           | \$0.19          | 21.6%                             | --                                   | --              | --                                |
| Alcoholic drinks                                                                  | \$63.68                          | \$0.40          | 16.3%                             | --                                  | --              | --                                | \$58.16                          | \$0.32          | 15.5%                             | --                                  | --              | --                                | \$39.08                           | \$0.61          | 15.5%                             | --                                   | --              | --                                |
| Take-away foods                                                                   | \$32.39                          | \$0.33          | 8.3%                              | --                                  | --              | --                                | \$34.76                          | \$0.37          | 9.2%                              | --                                  | --              | --                                | \$25.63                           | \$0.39          | 10.2%                             | --                                   | --              | --                                |
| Sugar sweetened soft drinks                                                       | \$4.58                           | \$0.05          | 1.2%                              | --                                  | --              | --                                | \$4.47                           | \$0.05          | 1.2%                              | --                                  | --              | --                                | \$1.34                            | <\$0.01         | 0.5%                              | --                                   | --              | --                                |
| <b>Total cost</b>                                                                 | <b>\$390.96</b>                  | <b>\$2.55</b>   | <b>100%</b>                       | <b>\$366.88</b>                     | <b>\$4.70</b>   | <b>100%</b>                       | <b>\$376.06</b>                  | <b>\$2.50</b>   | <b>100%</b>                       | <b>\$366.88</b>                     | <b>\$4.70</b>   | <b>100%</b>                       | <b>\$252.46</b>                   | <b>\$0.85</b>   | <b>100%</b>                       | <b>\$255.99</b>                      | <b>\$0.84</b>   | <b>100%</b>                       |
| Healthy foods and drinks                                                          | \$203.66                         | \$2.06          | 52.1%                             | \$366.88                            | \$4.70          | 100%                              | \$191.42                         | \$1.91          | 50.9%                             | \$366.88                            | \$4.70          | 100%                              | \$131.74                          | \$0.36          | 52.2%                             | \$255.99                             | \$0.84          | 100%                              |
| Discretionary foods and drinks                                                    | \$187.30                         | \$0.68          | 47.9%                             | --                                  | --              | --                                | \$184.64                         | \$0.74          | 49.1%                             | --                                  | --              | --                                | \$120.71                          | \$0.68          | 47.8%                             | --                                   | --              | --                                |

| Affordability of diets                                             |                                  |           |                                     |           |                                  |           |                                     |           |                                   |           |                                      |           |  |
|--------------------------------------------------------------------|----------------------------------|-----------|-------------------------------------|-----------|----------------------------------|-----------|-------------------------------------|-----------|-----------------------------------|-----------|--------------------------------------|-----------|--|
| Income amount (A\$)                                                | Broader population household     |           |                                     |           | Welfare dependent household      |           |                                     |           |                                   |           |                                      |           |  |
|                                                                    | Habitual Diet – branded products |           | Recommended Diet – branded products |           | Habitual Diet – branded products |           | Recommended Diet – branded products |           | Habitual Diet – cheapest products |           | Recommended Diet – cheapest products |           |  |
|                                                                    | Affordability                    | Std error | Affordability                       | Std error | Affordability                    | Std error | Affordability                       | Std error | Affordability                     | Std error | Affordability                        | Std error |  |
| September 2023 Welfare only household income \$1,827 per fortnight | 21.39%                           | 0.14%     | 20.08%                              | 0.26%     | 20.58%                           | 0.14%     | 20.08%                              | 0.26%     | 13.82%                            | 0.05%     | 14.01%                               | 0.05%     |  |

Table S18: Diet cost and affordability by food group and food group components of habitual and recommended diets, for a single adult male household (Household E) in Greater Brisbane, September 2023

| Mean food group and food group component costs per fortnight for Greater Brisbane |                                  |                 |                                   |                                     |                 |                                   |                                  |                 |                                   |                                     |                 |                                   |                                   |                 |                                   |                                      |                 |                                   |
|-----------------------------------------------------------------------------------|----------------------------------|-----------------|-----------------------------------|-------------------------------------|-----------------|-----------------------------------|----------------------------------|-----------------|-----------------------------------|-------------------------------------|-----------------|-----------------------------------|-----------------------------------|-----------------|-----------------------------------|--------------------------------------|-----------------|-----------------------------------|
| Food group and food group component                                               | Broader population household     |                 |                                   |                                     |                 |                                   | Welfare dependent household      |                 |                                   |                                     |                 |                                   |                                   |                 |                                   |                                      |                 |                                   |
|                                                                                   | Habitual Diet – branded products |                 |                                   | Recommended Diet – branded products |                 |                                   | Habitual Diet – branded products |                 |                                   | Recommended Diet – branded products |                 |                                   | Habitual Diet – cheapest products |                 |                                   | Recommended Diet – cheapest products |                 |                                   |
|                                                                                   | Cost (A\$)                       | Std Error (A\$) | Proportion of total diet cost (%) | Cost (A\$)                          | Std Error (A\$) | Proportion of total diet cost (%) | Cost (A\$)                       | Std Error (A\$) | Proportion of total diet cost (%) | Cost (A\$)                          | Std Error (A\$) | Proportion of total diet cost (%) | Cost (A\$)                        | Std Error (A\$) | Proportion of total diet cost (%) | Cost (A\$)                           | Std Error (A\$) | Proportion of total diet cost (%) |
| Water                                                                             | \$8.35                           | \$0.21          | 2.7%                              | \$8.35                              | \$0.21          | 4.1%                              | \$5.00                           | \$0.12          | 1.8%                              | \$8.35                              | \$0.21          | 4.1%                              | \$1.73                            | <\$0.01         | 0.9%                              | \$2.89                               | <\$0.01         | 2.1%                              |
| Fruit                                                                             | \$17.20                          | \$0.30          | 5.5%                              | \$25.37                             | \$1.03          | 12.4%                             | \$14.97                          | \$0.31          | 5.3%                              | \$25.37                             | \$1.03          | 12.4%                             | \$11.96                           | \$0.10          | 6.0%                              | \$24.35                              | \$0.33          | 17.5%                             |
| Veg. & Legumes                                                                    | \$19.84                          | \$0.24          | 6.3%                              | \$37.12                             | \$0.47          | 18.1%                             | \$18.97                          | \$0.22          | 6.7%                              | \$37.12                             | \$0.47          | 18.1%                             | \$14.75                           | \$0.08          | 7.4%                              | \$27.26                              | \$0.13          | 19.5%                             |
| Grains & Cereals                                                                  | \$16.15                          | \$0.22          | 5.2%                              | \$35.04                             | \$0.57          | 17.1%                             | \$12.28                          | \$0.19          | 4.3%                              | \$35.04                             | \$0.57          | 17.1%                             | \$5.65                            | \$0.05          | 2.8%                              | \$14.82                              | \$0.04          | 10.6%                             |
| Meats, nuts, seeds, egg & alternatives                                            | \$44.61                          | \$0.48          | 14.3%                             | \$59.48                             | \$0.62          | 29.1%                             | \$38.83                          | \$0.44          | 13.7%                             | \$59.48                             | \$0.62          | 29.1%                             | \$31.88                           | \$0.15          | 16.1%                             | \$47.22                              | \$0.19          | 33.8%                             |
| Milk, yoghurt, cheese & alternatives                                              | \$19.36                          | \$0.19          | 6.2%                              | \$33.54                             | \$0.31          | 16.4%                             | \$18.92                          | \$0.17          | 6.7%                              | \$33.54                             | \$0.31          | 16.4%                             | \$12.91                           | \$0.08          | 6.5%                              | \$20.01                              | \$0.14          | 14.3%                             |
| Unsaturated oils & spreads                                                        | \$0.54                           | \$0.01          | 0.2%                              | \$5.69                              | \$0.08          | 2.8%                              | \$0.70                           | \$0.01          | 0.2%                              | \$5.69                              | \$0.08          | 2.8%                              | \$0.33                            | \$0.01          | 0.2%                              | \$2.94                               | \$0.02          | 2.1%                              |
| Artificially sweetened soft drink                                                 | \$2.89                           | \$0.03          | 0.9%                              | --                                  | --              | --                                | \$2.51                           | \$0.03          | 0.9%                              | --                                  | --              | --                                | \$0.76                            | <\$0.01         | 0.4%                              | --                                   | --              | --                                |
| Discretionary choices - other                                                     | \$56.54                          | \$0.48          | 18.1%                             | --                                  | --              | --                                | \$54.18                          | \$0.44          | 19.1%                             | --                                  | --              | --                                | \$33.30                           | \$0.11          | 16.8%                             | --                                   | --              | --                                |
| Alcoholic drinks                                                                  | \$66.13                          | \$0.31          | 21.1%                             | --                                  | --              | --                                | \$54.73                          | \$0.25          | 19.3%                             | --                                  | --              | --                                | \$41.48                           | \$1.34          | 20.9%                             | --                                   | --              | --                                |
| Take-away foods                                                                   | \$51.16                          | \$0.42          | 16.3%                             | --                                  | --              | --                                | \$54.36                          | \$0.41          | 19.2%                             | --                                  | --              | --                                | \$41.40                           | \$0.43          | 20.8%                             | --                                   | --              | --                                |
| Sugar sweetened soft drinks                                                       | \$10.13                          | \$0.12          | 3.2%                              | --                                  | --              | --                                | \$8.02                           | \$0.09          | 2.8%                              | --                                  | --              | --                                | \$2.40                            | <\$0.01         | 1.2%                              | --                                   | --              | --                                |
| <b>Total cost</b>                                                                 | <b>\$312.90</b>                  | <b>\$1.90</b>   | <b>100%</b>                       | <b>\$204.59</b>                     | <b>\$2.64</b>   | <b>100%</b>                       | <b>\$283.47</b>                  | <b>\$1.67</b>   | <b>100%</b>                       | <b>\$204.59</b>                     | <b>\$2.64</b>   | <b>100%</b>                       | <b>\$198.57</b>                   | <b>\$1.50</b>   | <b>100%</b>                       | <b>\$139.49</b>                      | <b>\$0.44</b>   | <b>100%</b>                       |
| Healthy foods and drinks                                                          | \$128.94                         | \$1.31          | 41.2%                             | \$204.59                            | \$2.64          | 100%                              | \$112.18                         | \$1.16          | 39.6%                             | \$204.59                            | \$2.64          | 100%                              | \$79.98                           | \$0.25          | 40.3%                             | \$139.49                             | \$0.44          | 100%                              |
| Discretionary foods and drinks                                                    | \$183.96                         | \$0.84          | 58.8%                             | --                                  | --              | --                                | \$171.29                         | \$0.73          | 60.4%                             | --                                  | --              | --                                | \$118.59                          | \$1.39          | 59.7%                             | --                                   | --              | --                                |

| Affordability of diets                                           |                                  |           |                                     |           |                                  |           |                                     |           |                                   |           |                                      |           |
|------------------------------------------------------------------|----------------------------------|-----------|-------------------------------------|-----------|----------------------------------|-----------|-------------------------------------|-----------|-----------------------------------|-----------|--------------------------------------|-----------|
| Income amount (A\$)                                              | Broader population household     |           |                                     |           | Welfare dependent household      |           |                                     |           |                                   |           |                                      |           |
|                                                                  | Habitual Diet – branded products |           | Recommended Diet – branded products |           | Habitual Diet – branded products |           | Recommended Diet – branded products |           | Habitual Diet – cheapest products |           | Recommended Diet – cheapest products |           |
|                                                                  | Affordability                    | Std error | Affordability                       | Std error | Affordability                    | Std error | Affordability                       | Std error | Affordability                     | Std error | Affordability                        | Std error |
| September 2023 Welfare only household income \$875 per fortnight | 35.74%                           | 0.22%     | 23.37%                              | 0.30%     | 32.38%                           | 0.19%     | 23.37%                              | 0.30%     | 22.68%                            | 0.17%     | 15.93%                               | 0.05%     |

Table S19: Diet cost and affordability by food group and food group components of habitual and recommended diets, for an older single female household (Household F) in Greater Brisbane, September 2023

| Mean food group and food group component costs per fortnight for Greater Brisbane |                                  |                 |                                   |                                     |                 |                                   |                                  |                 |                                   |                                     |                 |                                   |                                   |                 |                                   |                                      |                 |                                   |
|-----------------------------------------------------------------------------------|----------------------------------|-----------------|-----------------------------------|-------------------------------------|-----------------|-----------------------------------|----------------------------------|-----------------|-----------------------------------|-------------------------------------|-----------------|-----------------------------------|-----------------------------------|-----------------|-----------------------------------|--------------------------------------|-----------------|-----------------------------------|
| Food group and food group component                                               | Broader population household     |                 |                                   |                                     |                 |                                   | Welfare dependent household      |                 |                                   |                                     |                 |                                   |                                   |                 |                                   |                                      |                 |                                   |
|                                                                                   | Habitual Diet – branded products |                 |                                   | Recommended Diet – branded products |                 |                                   | Habitual Diet – branded products |                 |                                   | Recommended Diet – branded products |                 |                                   | Habitual Diet – cheapest products |                 |                                   | Recommended Diet – cheapest products |                 |                                   |
|                                                                                   | Cost (A\$)                       | Std Error (A\$) | Proportion of total diet cost (%) | Cost (A\$)                          | Std Error (A\$) | Proportion of total diet cost (%) | Cost (A\$)                       | Std Error (A\$) | Proportion of total diet cost (%) | Cost (A\$)                          | Std Error (A\$) | Proportion of total diet cost (%) | Cost (A\$)                        | Std Error (A\$) | Proportion of total diet cost (%) | Cost (A\$)                           | Std Error (A\$) | Proportion of total diet cost (%) |
| Water                                                                             | \$1.79                           | \$0.04          | 1.0%                              | \$1.79                              | \$0.04          | 1.0%                              | \$0.66                           | \$0.02          | 0.4%                              | \$1.79                              | \$0.04          | 1.0%                              | \$0.23                            | <\$0.01         | 0.2%                              | \$0.62                               | <\$0.01         | 0.5%                              |
| Fruit                                                                             | \$19.41                          | \$0.31          | 11.3%                             | \$25.37                             | \$1.03          | 14.6%                             | \$18.34                          | \$0.28          | 10.9%                             | \$25.37                             | \$1.03          | 14.6%                             | \$13.72                           | \$0.09          | 12.2%                             | \$24.35                              | \$0.33          | 20.4%                             |
| Veg. & Legumes                                                                    | \$15.17                          | \$0.21          | 8.8%                              | \$30.23                             | \$0.45          | 17.5%                             | \$14.86                          | \$0.20          | 8.9%                              | \$30.23                             | \$0.45          | 17.5%                             | \$11.58                           | \$0.07          | 10.3%                             | \$23.36                              | \$0.12          | 19.6%                             |
| Grains & Cereals                                                                  | \$12.99                          | \$0.24          | 7.6%                              | \$17.73                             | \$0.28          | 10.2%                             | \$13.65                          | \$0.26          | 8.1%                              | \$17.73                             | \$0.28          | 10.2%                             | \$5.71                            | \$0.03          | 5.1%                              | \$7.98                               | \$0.02          | 6.7%                              |
| Meats, nuts, seeds, egg & alternatives                                            | \$33.27                          | \$0.39          | 19.4%                             | \$39.81                             | \$0.44          | 23.0%                             | \$31.00                          | \$0.35          | 18.5%                             | \$39.81                             | \$0.44          | 23.0%                             | \$24.09                           | \$0.12          | 21.4%                             | \$28.56                              | \$0.13          | 23.9%                             |
| Milk, yoghurt, cheese & alternatives                                              | \$13.36                          | \$0.11          | 7.8%                              | \$55.41                             | \$0.51          | 32.0%                             | \$12.25                          | \$0.10          | 7.3%                              | \$55.41                             | \$0.51          | 32.0%                             | \$7.85                            | \$0.04          | 7.0%                              | \$33.06                              | \$0.23          | 27.7%                             |
| Unsaturated oils & spreads                                                        | \$0.68                           | \$0.01          | 0.4%                              | \$2.86                              | \$0.04          | 1.7%                              | \$0.69                           | \$0.01          | 0.4%                              | \$2.86                              | \$0.04          | 1.7%                              | \$0.31                            | \$0.01          | 0.3%                              | \$1.48                               | \$0.01          | 1.2%                              |
| Artificially sweetened soft drink                                                 | \$0.37                           | <\$0.01         | 0.2%                              | --                                  | --              | --                                | \$0.22                           | \$0.00          | 0.1%                              | --                                  | --              | --                                | \$0.07                            | <\$0.01         | 0.1%                              | --                                   | --              | --                                |
| Discretionary choices - other                                                     | \$39.61                          | \$0.25          | 23.0%                             | --                                  | --              | --                                | \$38.88                          | \$0.25          | 23.2%                             | --                                  | --              | --                                | \$23.75                           | \$0.08          | 21.1%                             | --                                   | --              | --                                |
| Alcoholic drinks                                                                  | \$20.89                          | \$0.14          | 12.2%                             | --                                  | --              | --                                | \$22.24                          | \$0.13          | 13.3%                             | --                                  | --              | --                                | \$14.76                           | \$0.11          | 13.1%                             | --                                   | --              | --                                |
| Take-away foods                                                                   | \$12.49                          | \$0.11          | 7.3%                              | --                                  | --              | --                                | \$13.32                          | \$0.15          | 7.9%                              | --                                  | --              | --                                | \$9.85                            | \$0.15          | 8.8%                              | --                                   | --              | --                                |
| Sugar sweetened soft drinks                                                       | \$1.84                           | \$0.02          | 1.1%                              | --                                  | --              | --                                | \$1.46                           | \$0.02          | 0.9%                              | --                                  | --              | --                                | \$0.44                            | <\$0.01         | 0.4%                              | --                                   | --              | --                                |
| <b>Total cost</b>                                                                 | <b>\$171.88</b>                  | <b>\$1.22</b>   | <b>100%</b>                       | <b>\$173.20</b>                     | <b>\$2.26</b>   | <b>100%</b>                       | <b>\$167.58</b>                  | <b>\$1.19</b>   | <b>100%</b>                       | <b>\$173.20</b>                     | <b>\$2.26</b>   | <b>100%</b>                       | <b>\$112.34</b>                   | <b>\$0.25</b>   | <b>100%</b>                       | <b>\$119.41</b>                      | <b>\$0.41</b>   | <b>100%</b>                       |
| Healthy foods and drinks                                                          | \$97.05                          | \$1.02          | 56.5%                             | \$173.20                            | \$2.26          | 100%                              | \$91.68                          | \$0.94          | 54.7%                             | \$173.20                            | \$2.26          | 100%                              | \$63.55                           | \$0.18          | 56.6%                             | \$119.41                             | \$0.41          | 100%                              |
| Discretionary foods and drinks                                                    | \$74.83                          | \$0.30          | 43.5%                             | --                                  | --              | --                                | \$75.90                          | \$0.33          | 45.3%                             | --                                  | --              | --                                | \$48.80                           | \$0.16          | 43.4%                             | --                                   | --              | --                                |

| Affordability of diets                                                |                                  |           |                                     |           |                                  |           |                                     |           |                                   |           |                                      |           |
|-----------------------------------------------------------------------|----------------------------------|-----------|-------------------------------------|-----------|----------------------------------|-----------|-------------------------------------|-----------|-----------------------------------|-----------|--------------------------------------|-----------|
| Income amount (A\$)                                                   | Broader population household     |           |                                     |           | Welfare dependent household      |           |                                     |           |                                   |           |                                      |           |
|                                                                       | Habitual Diet – branded products |           | Recommended Diet – branded products |           | Habitual Diet – branded products |           | Recommended Diet – branded products |           | Habitual Diet – cheapest products |           | Recommended Diet – cheapest products |           |
|                                                                       | Affordability                    | Std error | Affordability                       | Std error | Affordability                    | Std error | Affordability                       | Std error | Affordability                     | Std error | Affordability                        | Std error |
| September 2023<br>Welfare only household income \$1,282 per fortnight | 13.41%                           | 0.10%     | 13.52%                              | 0.18%     | 13.08%                           | 0.09%     | 13.52%                              | 0.18%     | 8.77%                             | 0.02%     | 9.32%                                | 0.03%     |
